# Supplementary material for: Synthesis and photophysical properties of multimetallic gold/zinc complexes of (P,N,N,N,P) and (P,N,N) ligands
Source: Royal Society of Chemistry journal article supplement (doi:10.1039/d1nj05806a), 2022-01-01
Supplement: d1nj05806a1.pdf [file d1nj05806a1.pdf]

## Supporting Information

### **Synthesis and Photophysical Properties of Multimetallic Gold/Zinc Complexes of (P,N,N,N,P) and (P,N,N)Ligands**

Simon P. Walg,<sup>a</sup> Fabian Dietrich,<sup>b,c\*</sup> Anneken Grün,<sup>b</sup> Merve Cayir Küçükdisli,<sup>a</sup> Yu Sun,<sup>a</sup> Werner R. Thiel,<sup>a\*</sup> and Markus Gerhards<sup>b</sup>

<sup>a</sup> TU Kaiserslautern, Fachbereich Chemie, Erwin-Schrödinger Str. 54, 67663 Kaiserslautern, Germany; <sup>b</sup> TU Kaiserslautern & Research Center Optimas, Fachbereich Chemie, Erwin-Schrödinger Str. 52, 67663 Kaiserslautern, Germany; <sup>c</sup> Núcleo Milenio Multimát & Departamento de Ciencias Físicas, Universidad de La Frontera, Francisco Salazar 01145, Temuco, Chile.

|                                                                                           |    |
|-------------------------------------------------------------------------------------------|----|
| Experimental procedures . . . . .                                                         | 2  |
| Measured NMR spectra . . . . .                                                            | 6  |
| Measured IR spectra (ATR) . . . . .                                                       | 19 |
| Measured and simulated ESI spectra . . . . .                                              | 23 |
| Crystallographic data . . . . .                                                           | 25 |
| Measured and calculated UV/Vis spectra . . . . .                                          | 26 |
| Comparison of fluorescence spectra . . . . .                                              | 27 |
| Optimized Structure Geometries in chloroform . . . . .                                    | 29 |
| Potential energy scan for the rotation of the pyrimidine-pyridine bond . . . . .          | 31 |
| The effect of rotation and complexation of other ions on the absorption spectra . . . . . | 31 |
| Dipole moments . . . . .                                                                  | 32 |
| Overview of the first four excitations . . . . .                                          | 32 |
| Orbitals . . . . .                                                                        | 37 |
| Cooperativity . . . . .                                                                   | 40 |
| References . . . . .                                                                      | 41 |

## Experimental procedures

### General remarks

All reaction steps were carried out under an argon atmosphere using Schlenk techniques. All reactions involving gold(I) compounds were carried out in the absence of light. 2-Methyl-2-thiopseudothiourea hemisulfate, sodium methoxide, and zinc chloride were purchased from Sigma Aldrich and used without further purification. 2-Diphenylphosphinoethylamine,<sup>[1]</sup> 2-(*N,N'*-dimethylamino-1-oxoprop-2-en-1-yl)pyridine,<sup>[2]</sup> 2,6-bis[(*N,N'*-dimethylamino)-1-oxoprop-2-en-1-yl]pyridine,<sup>[2]</sup> and tetrahydrothiophene gold(I) chloride<sup>[3]</sup> were synthesized according to published procedures. All solvents were degassed according to standard techniques before use. <sup>1</sup>H, <sup>13</sup>C and <sup>31</sup>P NMR spectra were recorded on a Bruker Spectrospin Avance 400 device, ESI mass spectra were recorded on a Bruker Esquire 6000 equipment. X-ray structures were measured on an Oxford Diffraction Gemini S Ultra device. The structures were resolved and refined with ShelX.<sup>[4]</sup>

### 2-Diphenylphosphinoethylguanidinium sulfate dihydrate (**a**)

2-Diphenylphosphinoethylamine (24.8 g; 108 mmol) is added to aqueous ammonia (432 mmol of ammonia; 215 mL; 7.5 wt%). Upon stirring, 2-methyl-2-thiopseudothiourea hemisulfate (46.6 g; 167 mmol) is added in one portion and the reaction mixture is heated to 55 °C. The reaction is finished when the evolution of methanethiol ceases. After cooling to room temperature, the supernatant solution is decanted and the residue is washed with water (2×50 mL). The highly viscous yellowish oil is mixed with toluene (100 mL) and stirred at room temperature overnight. After this time, a colourless solid is filtered off and dried *in vacuo*. Yield: 19.8 g (29.2 mmol; 54 %) of a colourless solid. <sup>1</sup>H NMR / ppm (MeOH-*d*<sub>4</sub>; 400 MHz): 7.43-7.41 (m; 4H; H<sub>ortho</sub>), 7.35-7.33 (m; 6H; H<sub>meta</sub> and H<sub>para</sub>), 3.25 (q; <sup>3</sup>J<sub>HH</sub> = 7.9 Hz; 2H; NCH<sub>2</sub>), 2.57 (s, 1H, NH-CH<sub>2</sub>), 2.39 (t; <sup>3</sup>J<sub>HH</sub> = 7.9 Hz; 2H; PCH<sub>2</sub>). The amino protons cannot be assigned due to H-D exchange with the solvent. <sup>13</sup>C NMR / ppm (101 MHz, MeOH-*d*<sub>4</sub>): 158.4 (s; C(NH<sub>2</sub>)<sub>2</sub>), 138.9 (d; <sup>1</sup>J<sub>CP</sub> = 12.2 Hz; C<sub>ipso</sub>), 133.8 (d; <sup>2</sup>J<sub>CP</sub> = 19.6 Hz; C<sub>ortho</sub>), 129.9 (d; <sup>3</sup>J<sub>CP</sub> = 27.0 Hz; C<sub>meta</sub>), 129.7 (s; C<sub>para</sub>), 39.9 (d; <sup>2</sup>J<sub>CP</sub> = 25.6 Hz; NCH<sub>2</sub>), 28.7 (d; <sup>1</sup>J<sub>CP</sub> = 13.3 Hz; PCH<sub>2</sub>). <sup>31</sup>P NMR / ppm (MeOH-*d*<sub>4</sub>; 162 MHz): -22.0 (s). Elemental analysis / % : calcd. for [C<sub>30</sub>H<sub>42</sub>N<sub>6</sub>O<sub>6</sub>P<sub>2</sub>S] C 53.25, H 6.26, N 12.42, S 4.74; found C 53.04, H 5.87, N 11.99, S 4.56. HR-MS / m/z (EI+): calcd. for [**a** - H<sub>2</sub>SO<sub>4</sub>]<sup>+</sup> 271.1238; found 271.1241.

### 2-(2-(2-diphenylphosphinoethylamino)pyrimidin-4-yl)pyridine (**1**)

2-Diphenylphosphinoethylguanidinium sulfate dihydrate (**a**) (2.40 g; 3.80 mmol) is dissolved in ethanol (20 mL). 2-(*N,N'*-dimethylamino-1-oxoprop-2-en-1-yl)pyridine (1.00 g; 6.00 mmol) and sodium methoxide (0.50 g; 9.00 mmol) are added in succession and the resulting yellow suspension is heated to reflux for 24 hours. After cooling to room temperature, the volatiles are evaporated. The residue is extracted three times with dichloromethane (3×20 mL). The combined organic phases are washed with water (3×20 mL) and dried over sodium sulfate. The solvent is evaporated and the crude product is washed with methanol (2×20 mL) and dried *in vacuo*. Yield: 1.10 g (2.80 mmol; 46%) of a colourless solid. <sup>1</sup>H NMR / ppm (400 MHz, CDCl<sub>3</sub>): 8.68 (ddd; <sup>3</sup>J<sub>HH</sub> = 4.8 Hz; <sup>4</sup>J<sub>HH</sub> = 1.6 Hz, and <sup>5</sup>J<sub>HH</sub> = 0.8 Hz; 1H; H1), 8.41 (d; <sup>3</sup>J<sub>HH</sub> = 5.1 Hz; 1H; H8), 8.26 (d; <sup>3</sup>J<sub>HH</sub> = 7.9 Hz; 1H; H4), 7.79 (td; <sup>3</sup>J<sub>HH</sub> = 7.8 Hz and <sup>4</sup>J<sub>HH</sub> = 1.8 Hz; 1H; H3), 7.57 (d; <sup>3</sup>J<sub>HH</sub> = 5.1 Hz; 1H; H7), 7.79-7.44 (m; 4H; H<sub>o</sub>), 7.38-7.36 (m; 1H; H2); 7.35-7.31 (m; 6H; H<sub>m</sub> and H<sub>p</sub>), 5.41 (t; <sup>3</sup>J<sub>HH</sub> = 5.8 Hz; 1H; NH), 3.72-3.65 (m; 2H; H11), 2.49-2.46 (m; 2H; H12). <sup>13</sup>C NMR / ppm (100.6 MHz, CDCl<sub>3</sub>): 163.6 (s; C9), 162.3 (s; C8), 159.5 (s; C6), 154.9 (s; C5), 149.4

(s; C1), 138.2 (d;  $^1J_{CP} = 12.2$  Hz; C<sub>i</sub>), 137.0 (s; C3), 133.0 (d;  $^2J_{CP} = 18.8$  Hz; C<sub>o</sub>), 128.8 (s; C<sub>p</sub>), 128.7 (d;  $^3J_{CP} = 6.7$  Hz; C<sub>m</sub>), 125.1 (s; C2), 121.6 (s; C4), 107.1 (s; C7), 38.8 (d;  $^2J_{CP} = 22.7$  Hz; C10), 28.9 (d;  $^1J_{CP} = 13.2$  Hz; C11).  $^{31}\text{P}$  NMR / ppm (CDCl<sub>3</sub>, 162 MHz): -21.3 (s). Elemental analysis / %: calcd. for [C<sub>23</sub>H<sub>21</sub>N<sub>4</sub>P] C 71.86, H 5.51, N 14.57; found C 71.81, H 5.44, N 14.57.

For the assignment of the NMR resonances of compound **1** and its corresponding transition metal complexes, the atoms are numbered as shown.

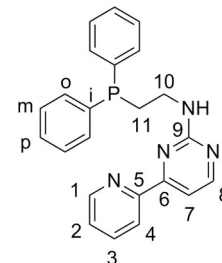

### Compound **1Zn**

Zinc dichloride (101 mg; 740  $\mu\text{mol}$ ) is dissolved in tetrahydrofuran (10 mL). **1** (284 mL; 740  $\mu\text{mol}$ ) is added in one portion and the mixture is stirred at room temperature for 16 hours. The solvent is evaporated. The residue is dissolved in dichloromethane (2 mL). After the addition of diethyl ether (10 mL), the colourless precipitate is filtered and dried in vacuo. Yield: 235 mg (451  $\mu\text{mol}$ , 61 %) of a colourless solid.  $^1\text{H}$  NMR / ppm (400 MHz, CDCl<sub>3</sub>): 8.82 (d;  $^3J_{HH} = 4.8$  Hz; 1H; H1), 8.69 (d;  $^3J_{HH} = 4.8$  Hz; 1H; H8), 8.21 (m; 2H; H3 and H4), 7.80 (d;  $^3J_{HH} = 4.7$  Hz; 1H; H2), 7.49-7.47 (m; 4H; H<sub>o</sub>), 7.35-7.33 (m; 6H; H<sub>m</sub> and H<sub>p</sub>), 7.29 (d;  $^3J_{HH} = 4.7$  Hz; 1H; H7), 6.53 (s; br; 1H; NH), 3.70-3.63 (m; 2H; H10); 2.50-2.46 (m; 2H; H11).  $^{13}\text{C}$  NMR / ppm (101 MHz, CDCl<sub>3</sub>): 163.6 (s; C9), 160.4 (s; C8), 155.6 (s; C6), 149.5 (s; C1), 148.4 (s; C5), 141.6 (s; C3), 132.9 (d;  $^2J_{CP} = 18.8$  Hz; C<sub>o</sub>), 131.0 (d;  $^1J_{CP} = 9.7$  Hz; C<sub>i</sub>), 129.0 (s; C2 and C<sub>p</sub>), 128.7 (d;  $^3J_{CP} = 6.8$  Hz; C<sub>m</sub>), 123.2 (s; C4), 105.9 (s; C7), 39.9 (d;  $^2J_{CP} = 26.1$  Hz; C10), 28.2 (d;  $^1J_{CP} = 13.6$  Hz; C11).  $^{31}\text{P}$  NMR / ppm (162 MHz, CDCl<sub>3</sub>): -22.0 (s). Elemental analysis / %: calcd. for [C<sub>23</sub>H<sub>21</sub>Cl<sub>2</sub>N<sub>4</sub>PZn] C 53.05, H 4.06, N 10.76; found C 52.60, H 4.31, N 10.66.

### Compound **1Au**

Tetrahydrothiophene gold(I) chloride (130 mg; 400  $\mu\text{mol}$ ) is dissolved in dichloromethane (10 mL). **1** (156 mg; 400  $\mu\text{mol}$ ) is added in one portion and the mixture is stirred at room temperature for one hour. The colourless solution is concentrated to a volume of about 1 mL. After the addition of diethyl ether (5 mL), a colourless precipitate forms, which is filtered and dried in vacuo. Yield: 222 mg (360  $\mu\text{mol}$ ; 89 %) of a colourless solid.  $^1\text{H}$  NMR / ppm (400 MHz, CDCl<sub>3</sub>): 8.68 (d;  $^3J_{HH} = 4.0$  Hz; 1H; H1), 8.39 (d;  $^3J_{HH} = 5.0$  Hz; 1H; H8), 8.32 (d;  $^3J_{HH} = 7.4$  Hz; 1H; H4), 7.90 (t;  $^3J_{HH} = 7.5$  Hz; 1H; H3), 7.71-7.66 (m; 4H; H<sub>o</sub>), 7.61 (d;  $^3J_{HH} = 5.0$  Hz; 1H; H7), 7.49-7.41 (m; 6H; H<sub>m</sub> and H<sub>p</sub>), 7.41-7.39 (m; 1H; H2), 5.48 (t;  $^3J_{HH} = 6.0$  Hz; 1H; H10), 3.94-3.86 (m; 2H; H11), 2.97-2.90 (m; 2H; H12).  $^{13}\text{C}$  NMR / ppm (101 MHz, CDCl<sub>3</sub>): 163.9 (s; C9), 161.7 (s; C8), 159.3 (s; C6), 154.3 (s; C5), 149.2 (s; C1), 137.4 (s; C3), 133.3 (d;  $^2J_{CP} = 13.3$  Hz; C<sub>o</sub>), 132.1 (d;  $^1J_{CP} = 2.4$  Hz; C<sub>i</sub>), 129.4 (d;  $^3J_{CP} = 11.7$  Hz; C<sub>m</sub>), 128.8 (s; C<sub>p</sub>), 125.3 (s; C2), 121.8 (s; C4), 107.8 (s; C7), 38.7 (d;  $^2J_{CP} = 7.8$  Hz; C13), 28.5 (d;  $^1J_{CP} = 35.5$  Hz; C12).  $^{31}\text{P}$  NMR / ppm (162 MHz, CDCl<sub>3</sub>): 24.4 (s). Elemental analysis / %: calcd. for [C<sub>23</sub>H<sub>21</sub>AuClN<sub>4</sub>P] C 44.78, H 3.43, N 9.08; found C 44.25, H 3.66, N 8.63.

## Compound **1AuZn**

Zinc chloride (33.0 mg; 240  $\mu\text{mol}$ ) is suspended in dichloromethane (5 mL). **1Au** (150 mg; 240  $\mu\text{mol}$ ) is dissolved in dichloromethane and dropwise added to the suspension for 30 minutes. After stirring for 24 hours at room temperature, the solvent is evaporated and the residue is washed with diethyl ether (2 $\times$ 5 ml). Yield: 140 mg (190  $\mu\text{mol}$ , 77 %) of a colourless solid.  $^1\text{H}$  NMR / ppm (400 MHz,  $\text{CDCl}_3$ ): 8.76 (m; 1H; H1), 8.68 (s; br; 1H; H8), 8.26 (s; br; 1H; H4), 8.14 (s; br; 1H; H3), 7.73-7.68 (m; 5H; H2 and H<sub>o</sub>), 7.53-7.46 (m; 7H; H7, H<sub>m</sub>, and H<sub>p</sub>), 6.52 (s; 1H; NH), 3.90-3.85 (m; 2H; H10), 2.91 (td;  $^2J_{\text{PH}} = 10.8$  Hz and  $^3J_{\text{HH}} = 7.8$  Hz; 2H; H11).  $^{13}\text{C}$  NMR / ppm (101 MHz,  $\text{CDCl}_3$ ): 163.7 (s; C9), 160.2 (s; C8), 155.9 (s; C6), 149.6 (s; C1), 148.3 (s; C5), 141.7 (s; C3), 133.4 (d;  $^2J_{\text{CP}} = 13.5$  Hz; C<sub>o</sub>), 132.4 (d;  $^1J_{\text{CP}} = 2.6$  Hz; C<sub>i</sub>), 129.6 (d;  $^3J_{\text{CP}} = 11.8$  Hz; C<sub>m</sub>), 128.8 (s; C<sub>p</sub>), 128.2 (s; C2), 123.6 (s; C4), 106.8 (s; C5), 38.6 (d;  $^2J_{\text{CP}} = 10.8$  Hz; C10), 28.4 (d;  $^1J_{\text{CP}} = 36.5$  Hz; C9).  $^{31}\text{P}$  NMR / ppm (162 MHz,  $\text{CDCl}_3$ ): 23.5 (s). Elemental analysis / %: calcd. for  $[\text{C}_{23}\text{H}_{21}\text{AuCl}_3\text{N}_4\text{PZn}]$  C 36.68, H 2.81, N 7.44; found C 37.24, H 2.81, N 7.37.

## 2,6-Bis(2-(2-diphenylphosphinoethylamino)pyrimidin-4-yl)pyridine (**2**)

2-Diphenylphosphinoethylguanidinium sulfate dihydrate (**a**) (10.5 g; 15.5 mmol) is dissolved in ethanol (100 mL). 2,6-Bis[(*N,N'*-dimethylamino)-1-oxoprop-2-en-1-yl]-pyridine (2.73 g; 10.0 mmol) and sodium methoxide (1.62 g; 30.0 mmol) are added in succession and the resulting yellow suspension is heated to reflux for 20 hours. Upon heating, a yellow solution forms, followed by the formation of a precipitate. After cooling to -35  $^\circ\text{C}$ , the precipitate is filtered and dried. The crude product is added to water (25 ml), stirred for two hours and filtered again. The solid is washed with diethyl ether (2 $\times$ 50 mL) and dried in vacuo. Yield: 4.13 g (5.99 mmol; 60%) of a colourless solid.  $^1\text{H}$  NMR / ppm ( $\text{CDCl}_3$ , 400 MHz): 8.44 (d;  $^3J_{\text{HH}} = 5.1$  Hz; 2H; H6), 8.34 (d;  $^3J_{\text{HH}} = 7.8$  Hz; 2H; H2), 7.89 (t;  $^3J_{\text{HH}} = 7.8$  Hz; 1H; H1), 7.74 (d;  $^3J_{\text{HH}} = 5.1$  Hz; 2H; H5), 7.54-7.42 (m; 8H; H<sub>o</sub>), 7.34-7.32 (m; 12H; H<sub>m</sub> and H<sub>p</sub>), 5.47 (t;  $^3J_{\text{HH}} = 5.9$  Hz; 2H; NH), 3.71 (quint;  $^3J_{\text{HH}} = 7.3$  Hz; 4H; H8), 2.49 (t;  $^3J_{\text{HH}} = 7.6$  Hz; 4H; H9).  $^{13}\text{C}$  NMR / ppm ( $\text{CDCl}_3$ , 101 MHz): 163.4 (s; C7), 162.3 (s; C4), 159.4 (s; C6), 154.2 (s; C3), 138.2 (d;  $^1J_{\text{CP}} = 12.3$  Hz; C<sub>i</sub>), 137.9 (s; C1), 132.9 (d;  $^2J_{\text{CP}} = 18.7$  Hz; C<sub>o</sub>), 128.8 (s; C<sub>p</sub>), 128.7 (d;  $^3J_{\text{CP}} = 7.0$  Hz; C<sub>m</sub>), 122.7 (s; C2), 107.2 (s; C5), 38.9 (d;  $^2J_{\text{CP}} = 22.8$  Hz; C8), 28.9 (d;  $^1J_{\text{CP}} = 13.1$  Hz; C9).  $^{31}\text{P}$  NMR / ppm ( $\text{CDCl}_3$ , 162 MHz): -21.2 (s). Elemental analysis / %: calcd. for  $[\text{C}_{41}\text{H}_{37}\text{N}_7\text{P}_2]$  C 71.40, H 5.41, N 14.22; found C 70.96, H 5.30, N 14.21. HR-MS /  $m/z$  (EI<sup>+</sup>): calcd. for  $[\text{C}_{41}\text{H}_{37}\text{N}_7\text{P}_2]^+$  689.2586; found 689.2580. SI: NMR and IR spectra.

For the assignment of the NMR resonances of compound **2** and its transition metal complexes, the atoms are numbered as shown.

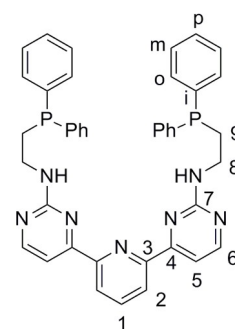

### Compound **2Zn**

Zinc dichloride (20.7 mg; 152  $\mu\text{mol}$ ) is dissolved in tetrahydrofuran (10 ml). **2** (105 mg; 152  $\mu\text{mol}$ ) is added in one portion and the mixture is stirred at room temperature for 16 hours whereby the colourless suspension turns into a yellow solution. The volatiles are evaporated. The residue is mixed with dichloromethane (1.5 mL) and filtered to remove residual zinc chloride. After the addition of diethyl ether (10 mL), a yellow precipitate forms, which is filtered and dried in vacuo. Yield: 108 mg (131  $\mu\text{mol}$ ; 86 %) of a yellow solid.  $^1\text{H}$  NMR / ppm (400 MHz,  $\text{CDCl}_3$ ): 8.55 (d;  $^3J_{\text{HH}} = 4.8$  Hz; 2H; H6), 8.24 (s; 3H; H1 and H2), 7.53-7.48 (m; 8H  $\text{H}_o$ ), 7.36-7.34 (m; 12H  $\text{H}_m$  and  $\text{H}_p$ ), 7.22 (d;  $^3J_{\text{HH}} = 4.8$  Hz; 2H H5), 3.73-3.68 (m; 4H; H8), 2.60-2.56 (m; 4H; H9).  $^{13}\text{C}$  NMR / ppm (101 MHz,  $\text{CDCl}_3$ ): 162.2 (s; C7), 160.9 (s; C6), 154.1 (s; C4), 148.8 (s; C3), 142.9 (s; C1), 133.0 (d;  $^2J_{\text{CP}} = 17.9$  Hz;  $\text{C}_o$ ), 131.2 (d;  $^1J_{\text{CP}} = 10.2$  Hz;  $\text{C}_i$ ), 129.2 (s;  $\text{C}_p$ ), 128.8 (d;  $^3J_{\text{CP}} = 7.1$  Hz;  $\text{C}_m$ ), 124.4 (s; C2), 105.7 (s; C5), 39.5 (d;  $^2J_{\text{CP}} = 24.9$  Hz; C8), 27.7 (s; C9).  $^{31}\text{P}$  NMR / ppm (162 MHz,  $\text{CDCl}_3$ ): -20.6 (s). Elemental analysis / %: calcd. for  $[\text{C}_{41}\text{H}_{37}\text{Cl}_2\text{N}_7\text{P}_2\text{Zn}]$  C 59.62, H 4.51, N 11.87; found C 59.85, H 4.99, N 12.02. SI: NMR, IR, and ESI spectra.

### Compound **2Au<sub>2</sub>**

Tetrahydrothiophene gold(I) chloride (138 mg; 430  $\mu\text{mol}$ ) is dissolved in dichloromethane (7.5 mL). **2** (141 mg; 205  $\mu\text{mol}$ ) is added in one portion and the mixture is stirred at room temperature for 20 minutes. The colourless solution is concentrated to a volume of about 1.5 ml. After the addition of diethyl ether (10 mL), a colourless precipitate forms, which is filtered and dried in vacuo. Yield: 201 mg (174  $\mu\text{mol}$ ; 85 %) of a colourless solid.  $^1\text{H}$  NMR / ppm ( $\text{CDCl}_3$ , 400 MHz): 8.49-8.39 (m; 4H; H2 and H6), 8.07 (s; br; 1H; H1), 7.77 (d;  $^3J_{\text{HH}} = 4.9$  Hz; 2H; H5), 7.71-7.67 (m; 8H;  $\text{H}_o$ ), 7.50-7.44 (m; 12H;  $\text{H}_m$  and  $\text{H}_p$ ), 5.50 (s; 2H; NH), 3.92 (s; br; 4H; H8), 2.98-2.92 (m; 4H; H9).  $^{13}\text{C}$  NMR / ppm ( $\text{CDCl}_3$ , 101 MHz): 163.5 (s; C7), 161.8 (s; C6), 153.8 (s; C3 and C4), 133.3 (d;  $^2J_{\text{CP}} = 13.3$  Hz;  $\text{C}_o$ ), 132.2 (d;  $^1J_{\text{CP}} = 1.7$  Hz;  $\text{C}_i$ ), 129.5 (d;  $^3J_{\text{CP}} = 11.8$  Hz;  $\text{C}_m$ ), 128.8 (s;  $\text{C}_p$ ), 123.1 (s; C2), 107.8 (s; C5), 38.6 (d;  $^2J_{\text{CP}} = 10.6$  Hz; C8), 28.6 (d;  $^1J_{\text{CP}} = 37.3$  Hz; C9).  $^{31}\text{P}$  NMR / ppm ( $\text{CDCl}_3$ , 162 MHz): 24.23 (s). Elemental analysis / %: calcd. for  $[\text{C}_{41}\text{H}_{37}\text{Au}_2\text{Cl}_2\text{N}_7\text{P}_2]$  C 42.65, H 3.23, N 8.49; found C 42.85, H 3.29, N 8.44. SI: NMR, IR and ESI spectra.

### Compound **2Au<sub>2</sub>Zn**

Tetrahydrothiophene gold(I) chloride (98.6 mg; 306  $\mu\text{mol}$ ) is dissolved in dichloromethane (10 mL). **2Zn** (141 mg; 205  $\mu\text{mol}$ ) is added in one portion and the mixture is stirred at room temperature for two hours. The yellowish solution is concentrated to a volume of about 1.5 ml. After the addition of diethyl ether (10 mL), a pale yellow precipitate forms, which is filtered and dried in vacuo. Yield: 145 mg (112  $\mu\text{mol}$ ; 75 %) of a colourless solid. Crystals suitable for X-ray structure analysis were obtained from a concentrated acetonitrile solution.  $^1\text{H}$  NMR / ppm (400 MHz,  $\text{CDCl}_3$ ): 8.55 (d;  $^3J_{\text{HH}} = 4.9$  Hz; 2H; H6), 8.34 (m; 3H; H1 and H2), 7.75-7.69 (m; 8H;  $\text{H}_o$ ), 7.56-7.47 (m; 14H; NH,  $\text{H}_m$ , and  $\text{H}_p$ ), 7.35 (d;  $^3J_{\text{HH}} = 4.9$  Hz; 2H; H5), 3.91-3.83 (m; 4H; H8), 2.96 (m; 4H; H9).  $^{13}\text{C}$  NMR / ppm (101 MHz,  $\text{CDCl}_3$ ): 162.4 (s; C7), 160.8 (s; C6), 154.3 (s; C4), 148.8 (s; C3), 143.0 (s; C1), 133.4 (d;  $^2J_{\text{CP}} = 13.6$  Hz;  $\text{C}_o$ ), 132.3 (d;  $^1J_{\text{CP}} = 2.4$  Hz;  $\text{C}_i$ ), 129.5 (d;  $^3J_{\text{CP}} = 11.9$  Hz;  $\text{C}_m$ ), 129.1 (s;  $\text{C}_p$ ), 128.5 (s; C2), 106.6 (s; C5), 38.5 (d;  $^2J_{\text{CP}} = 10.5$  Hz; C8), 28.5 (d;  $^1J_{\text{CP}} = 36.5$  Hz; C9).  $^{31}\text{P}$  NMR / ppm (162 MHz,  $\text{CDCl}_3$ ): 23.6 (s). Elemental analysis / %: calcd. for  $[\text{C}_{41}\text{H}_{37}\text{Au}_2\text{Cl}_4\text{N}_7\text{P}_2\text{Zn}]$  C 38.15, H 2.89, N 7.48; found C 37.76, H 3.05, N 7.48. SI: NMR, IR, and ESI spectra.

## Measured NMR spectra

$^1\text{H}$ ,  $^{13}\text{C}$ , and  $^{31}\text{P}$  NMR spectrum of **a**

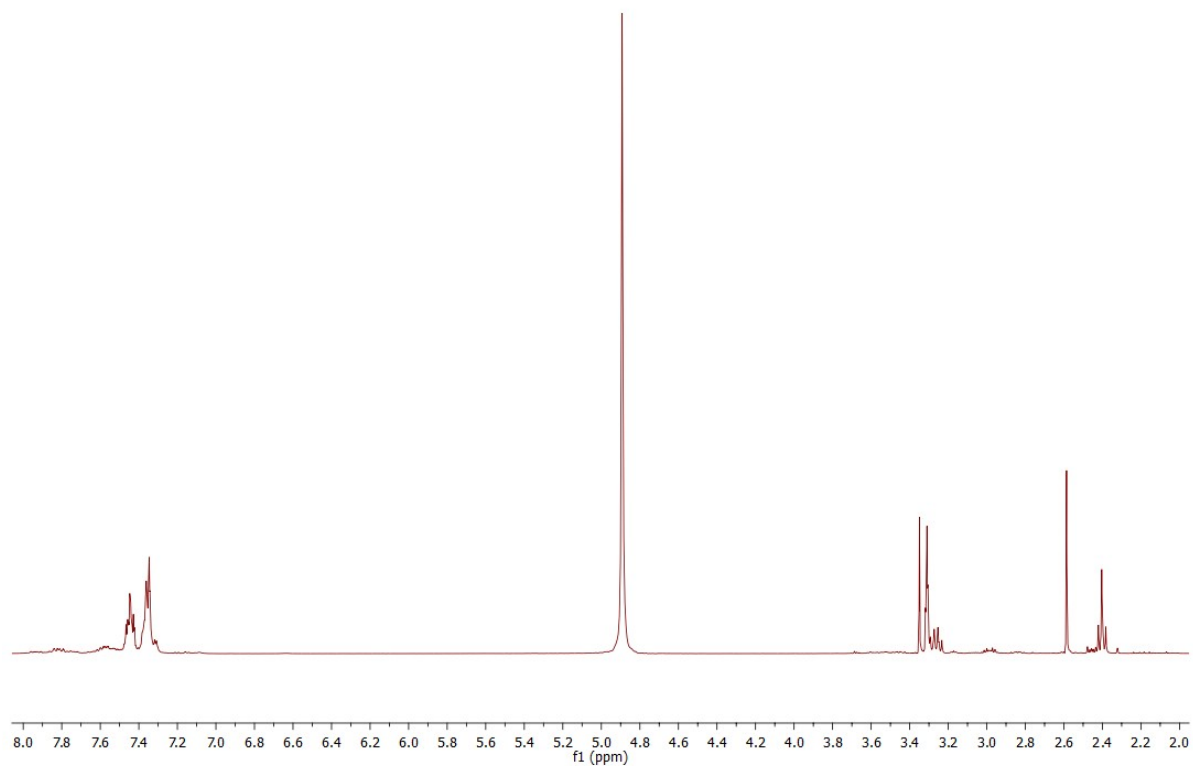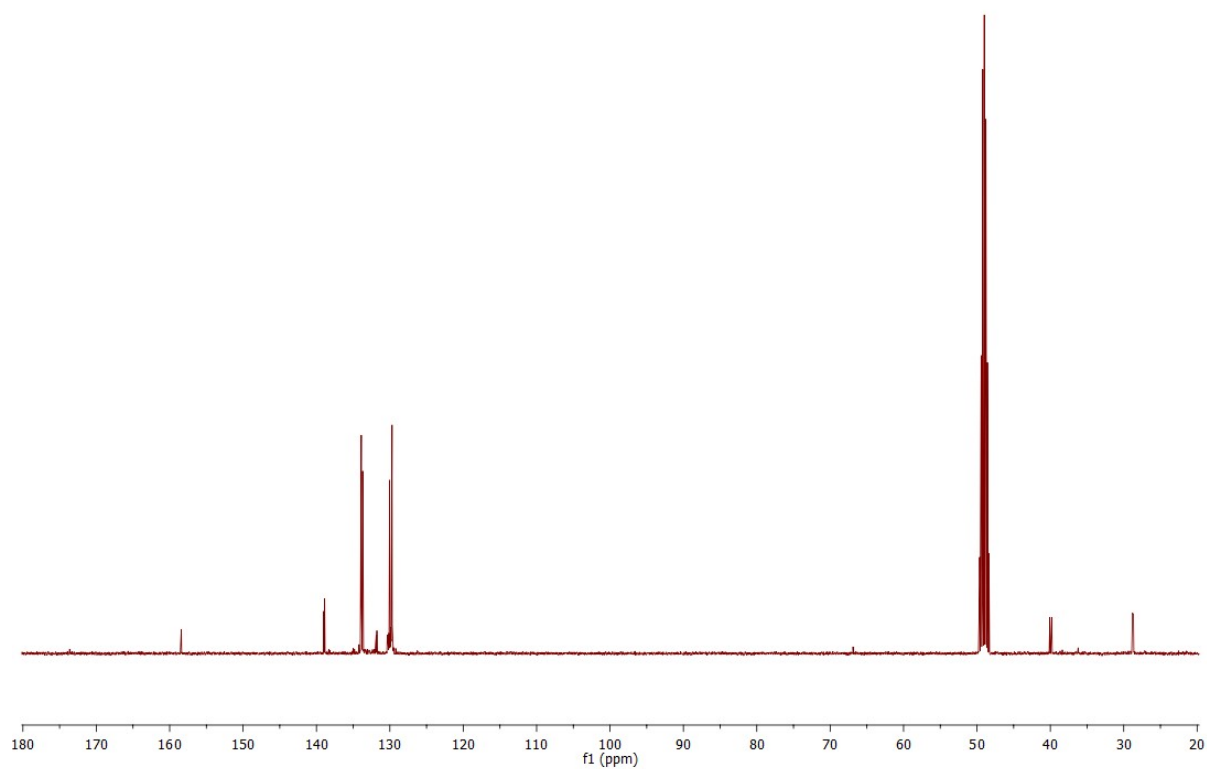

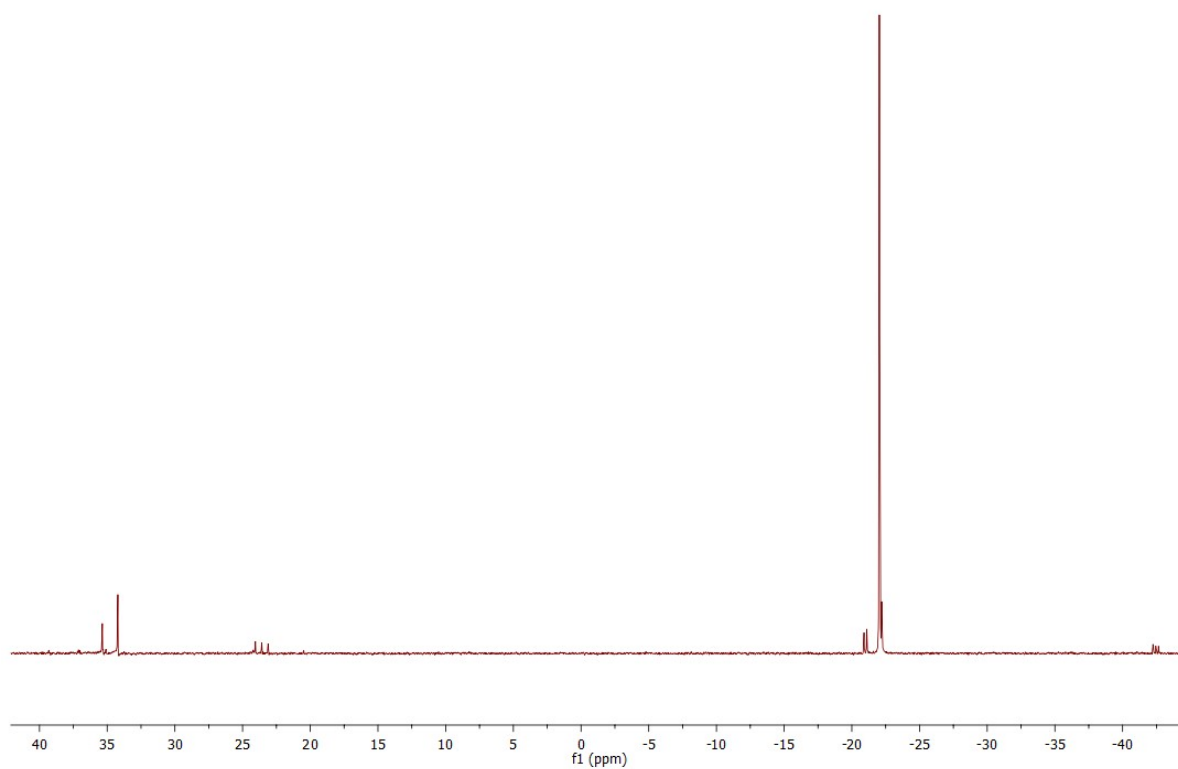

$^1\text{H}$ ,  $^{13}\text{C}$ , and  $^{31}\text{P}$  NMR spectrum of **1**

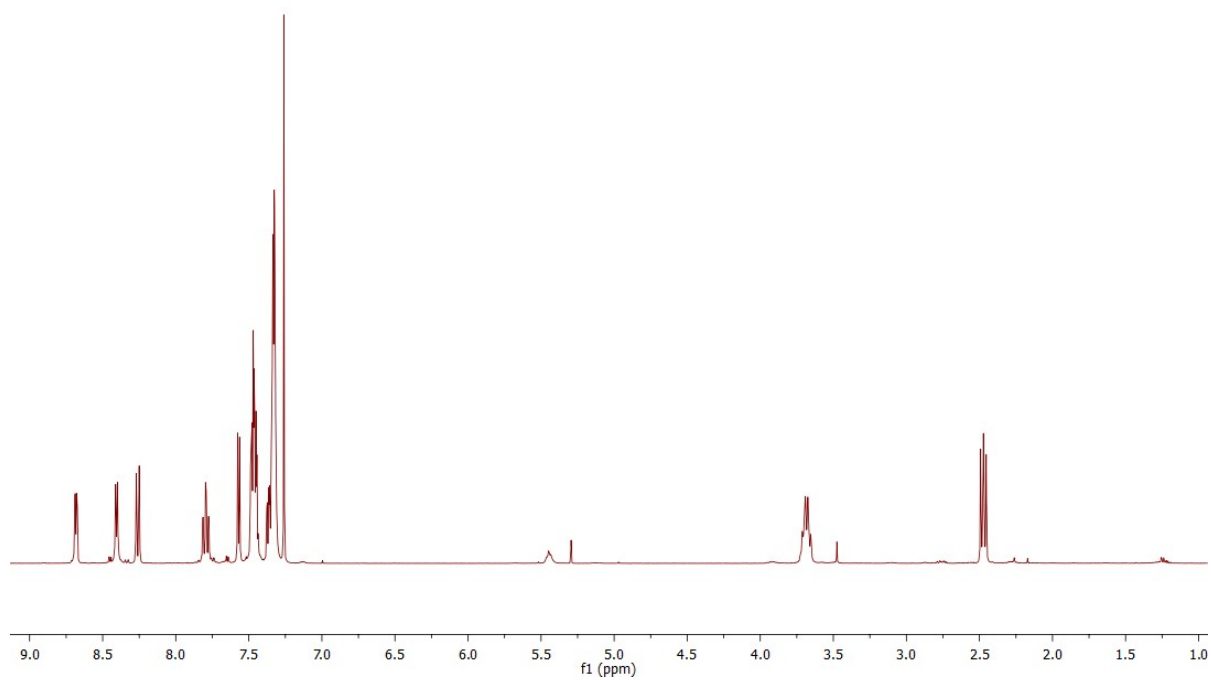

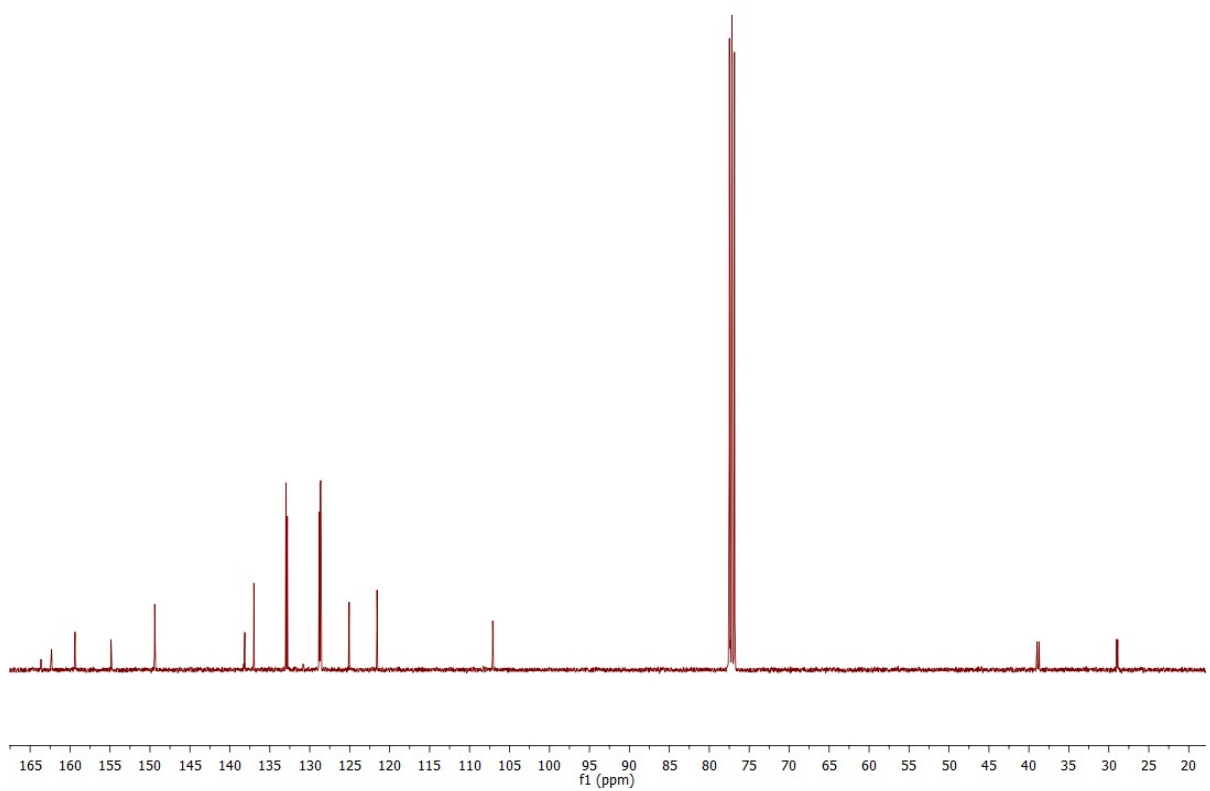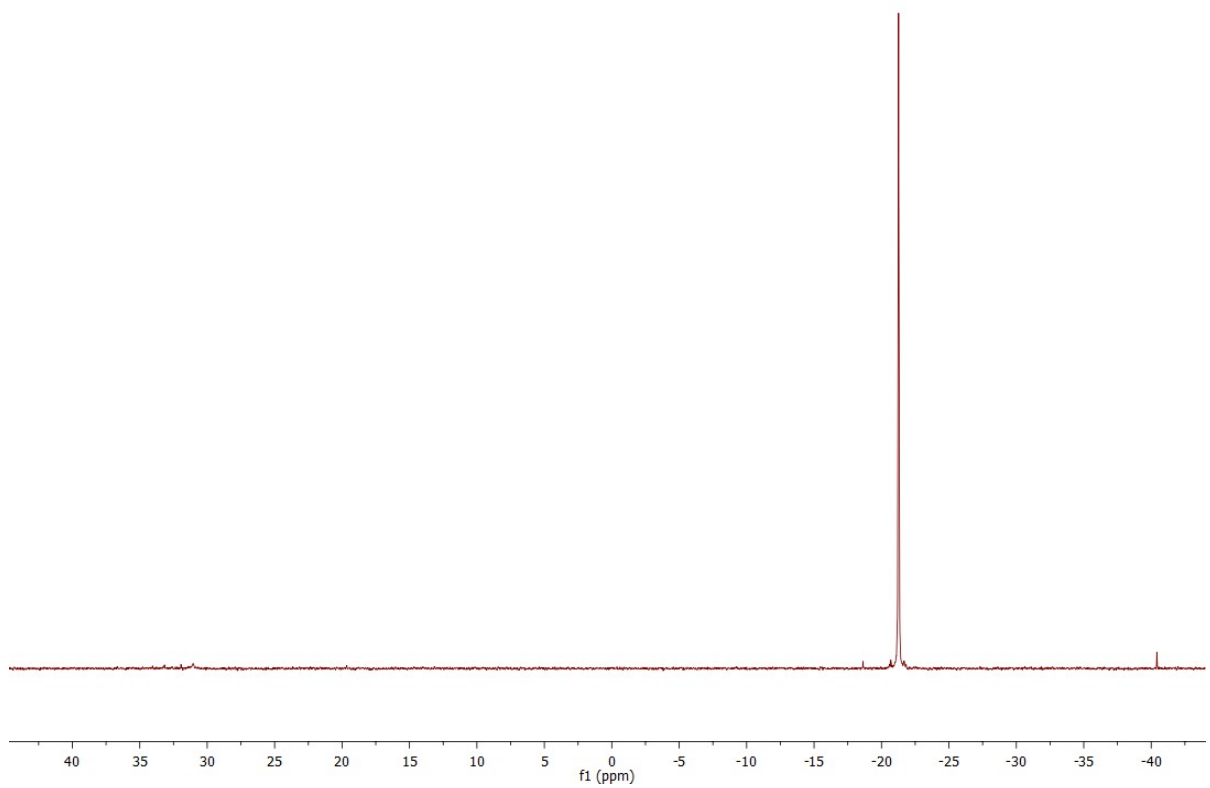



$^1\text{H}$ ,  $^{13}\text{C}$ , and  $^{31}\text{P}$  NMR spectrum of **1Zn**

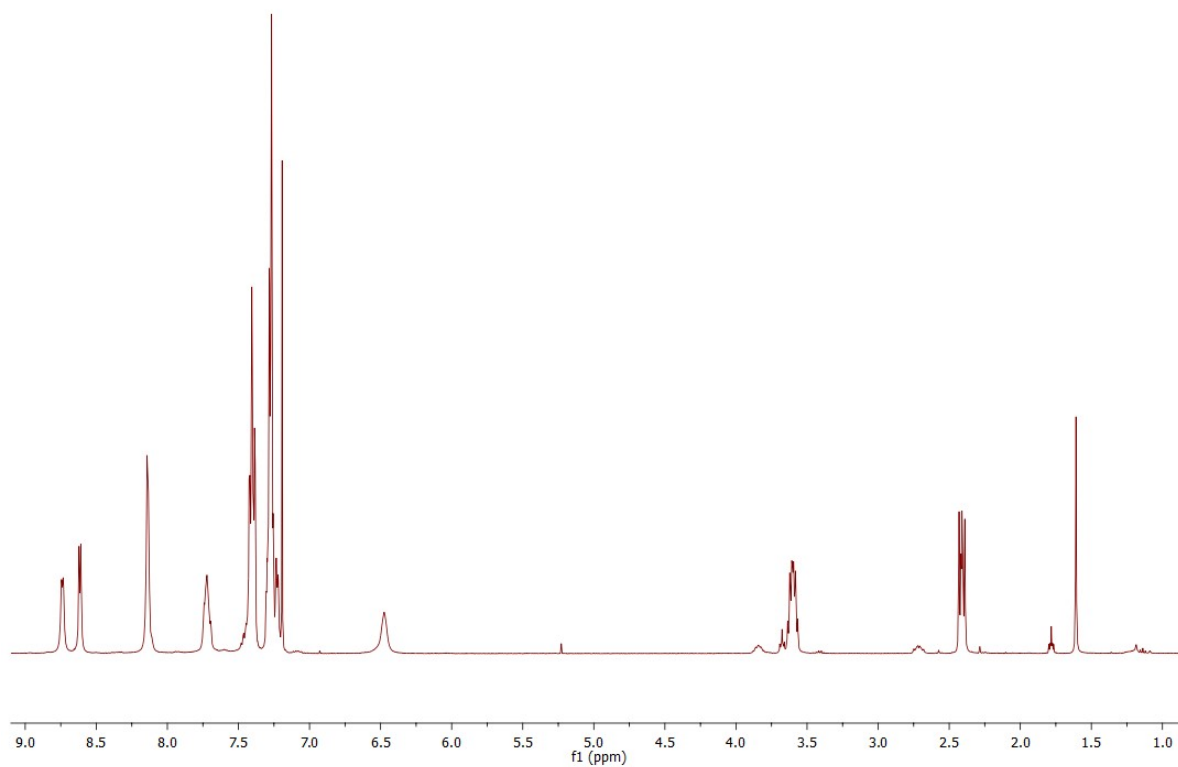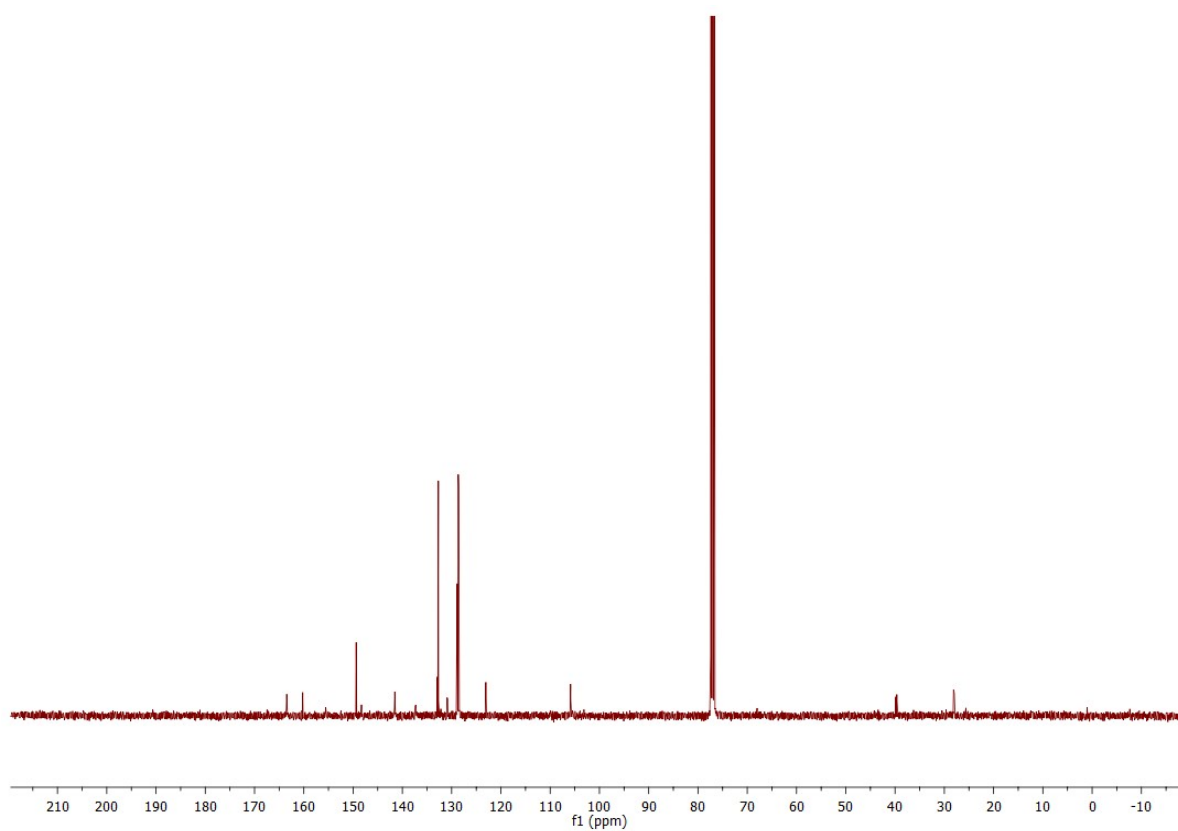

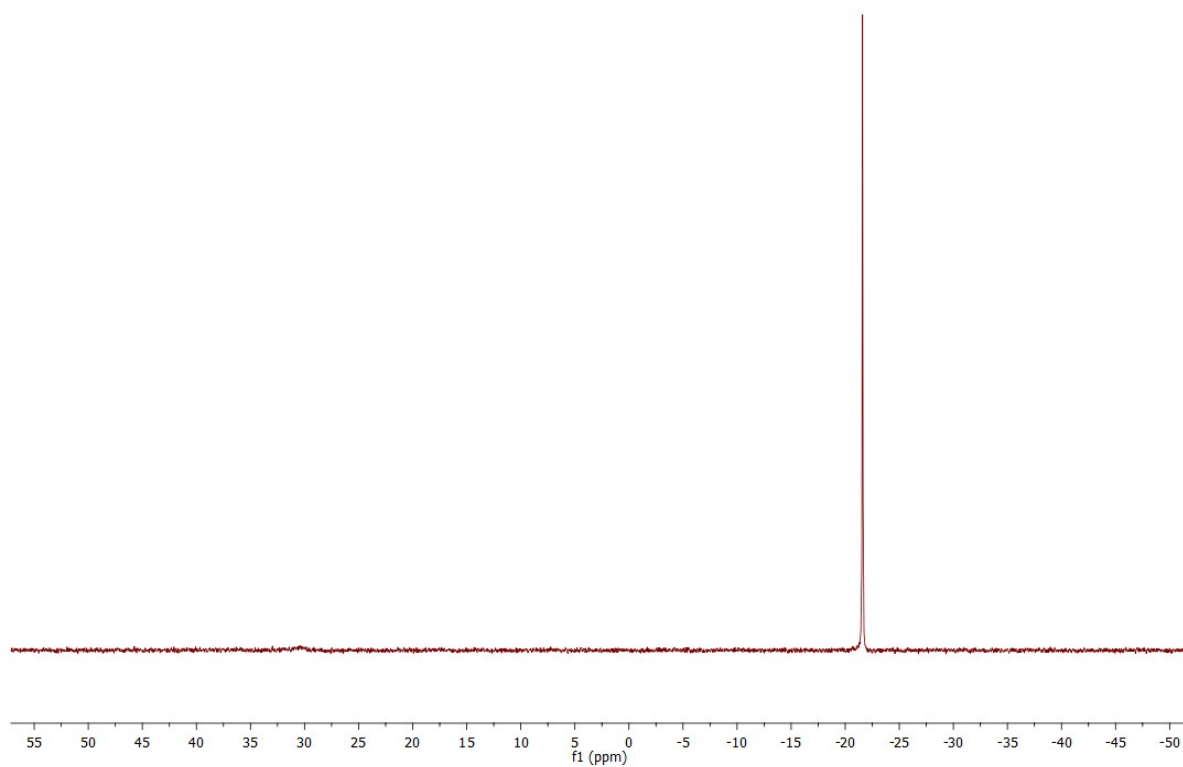

$^1\text{H}$ ,  $^{13}\text{C}$ , and  $^{31}\text{P}$  NMR spectrum of **1Au**

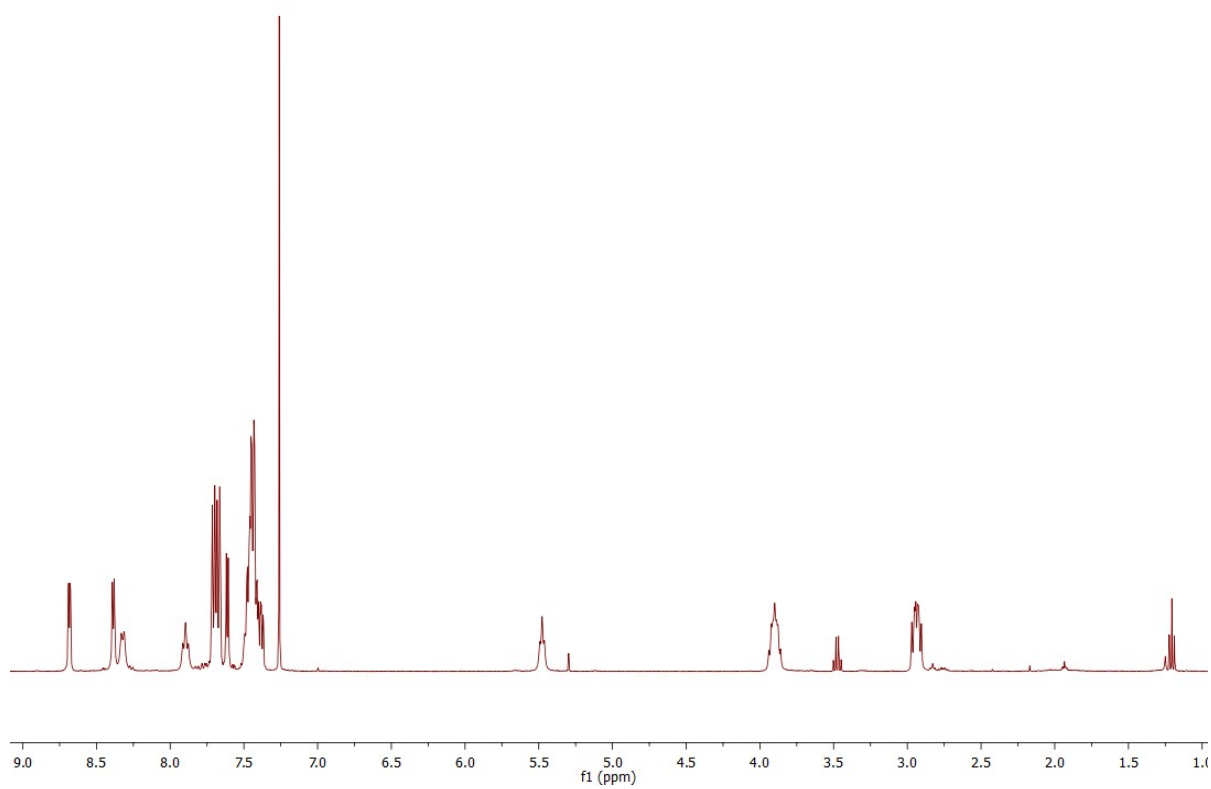

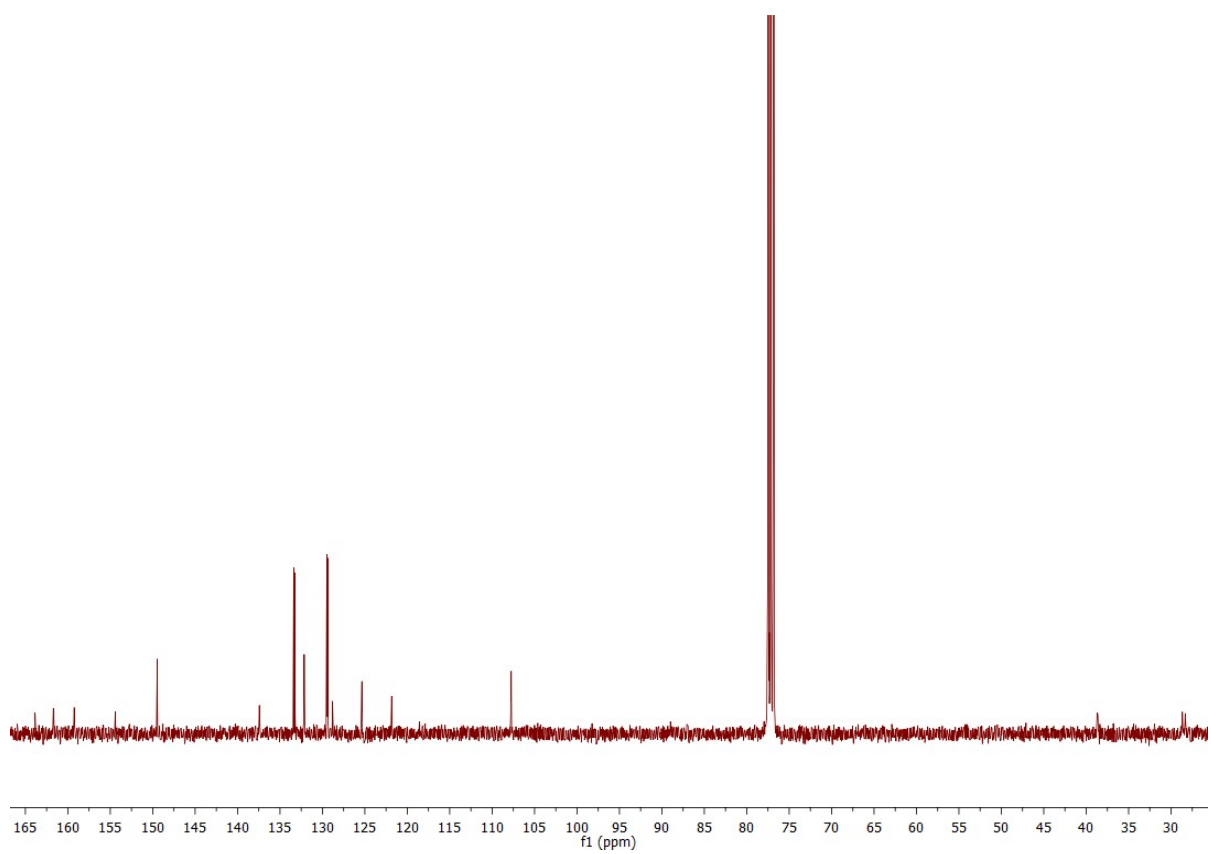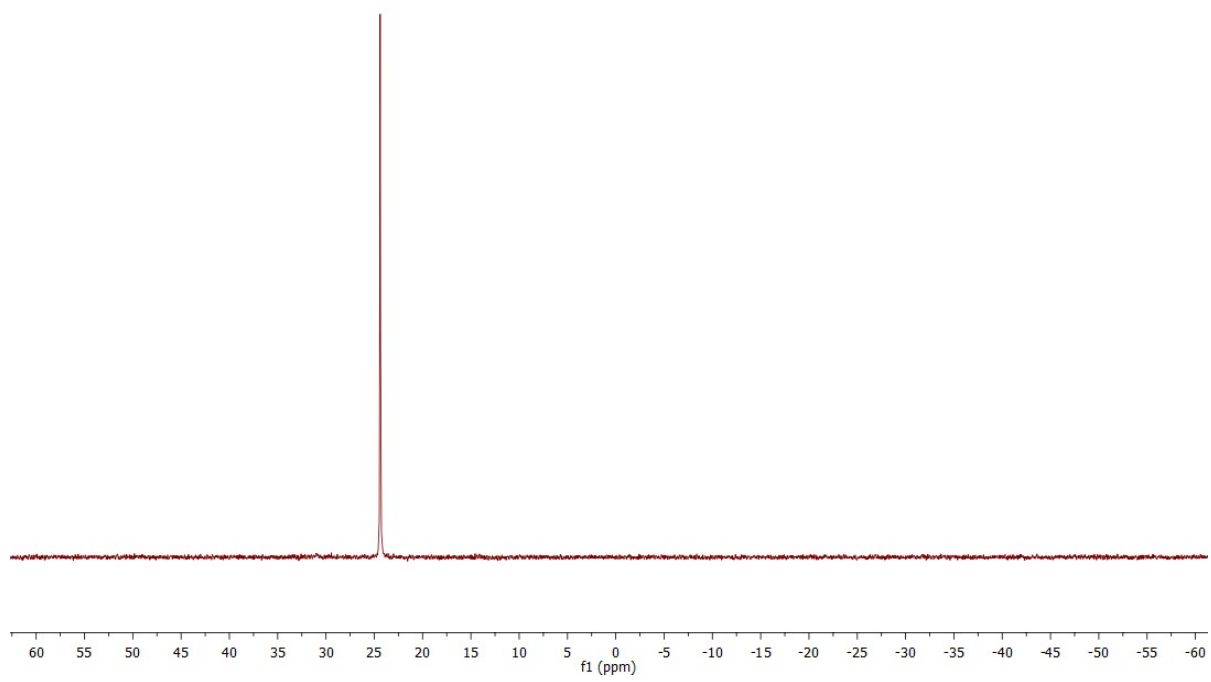

$^1\text{H}$ ,  $^{13}\text{C}$ , and  $^{31}\text{P}$  NMR spectrum of **1AuZn**

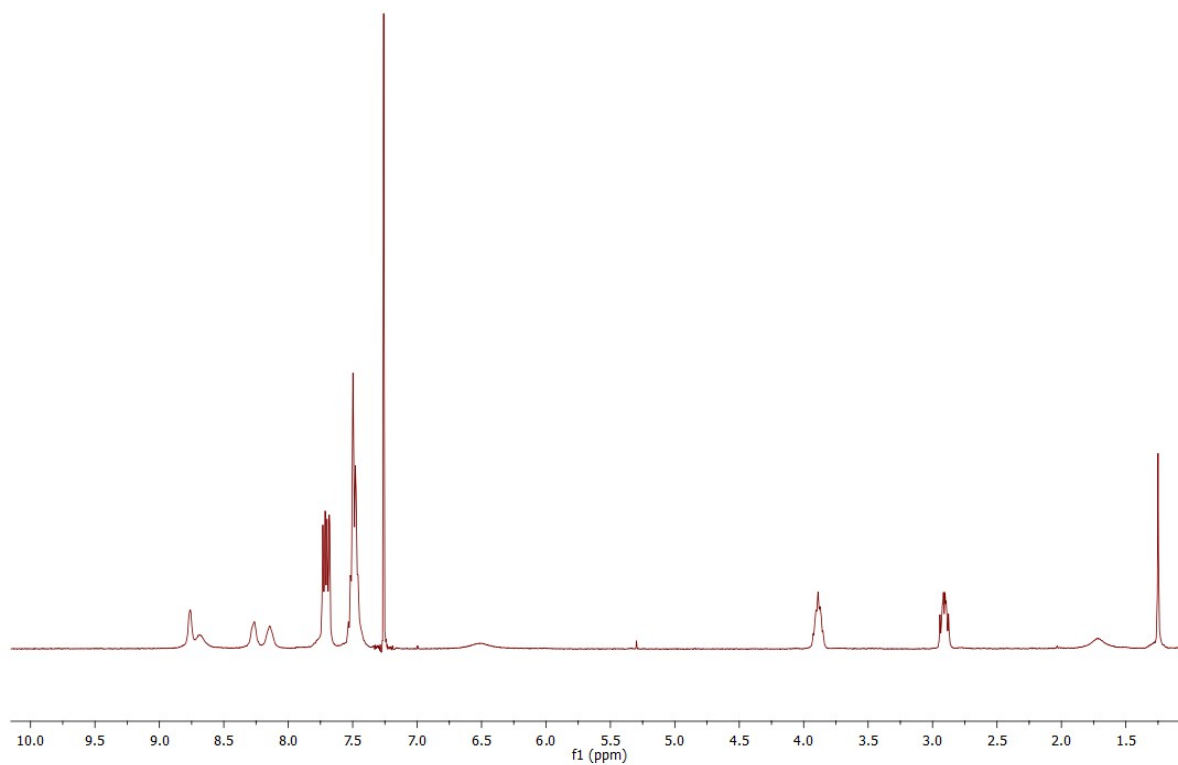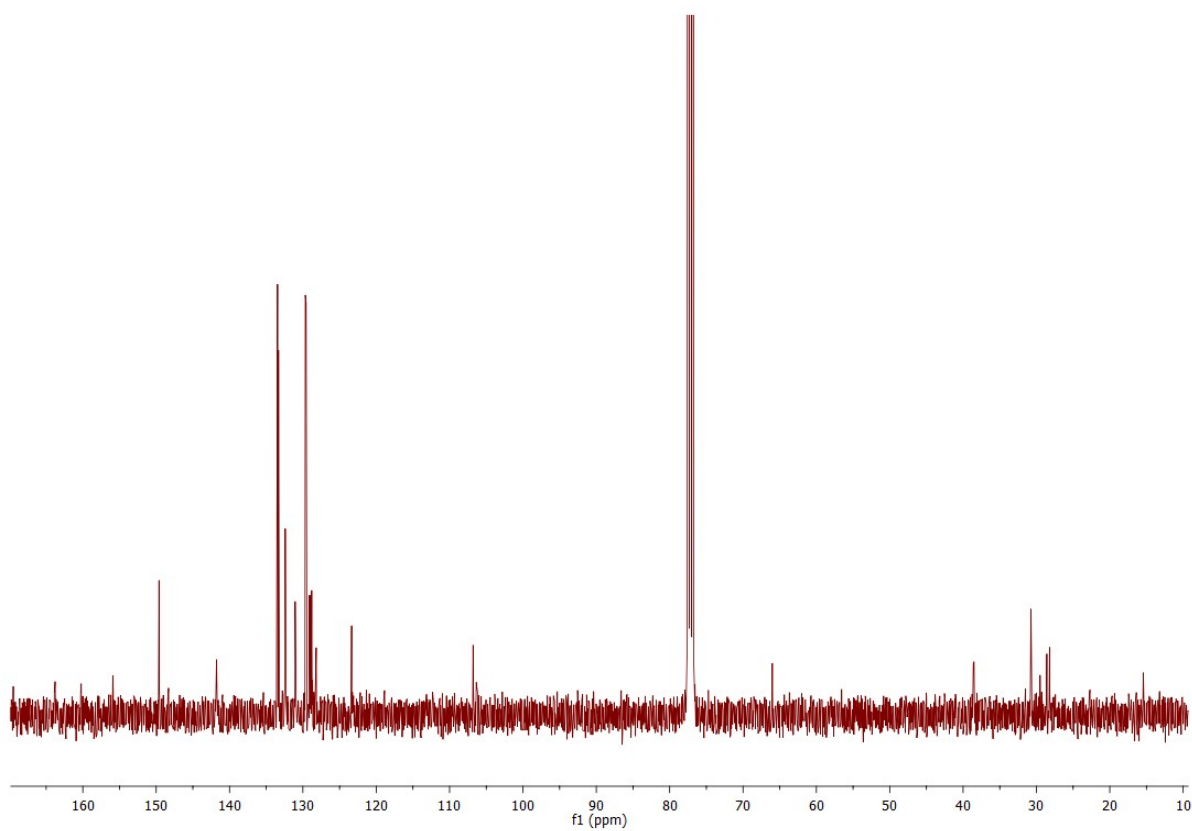

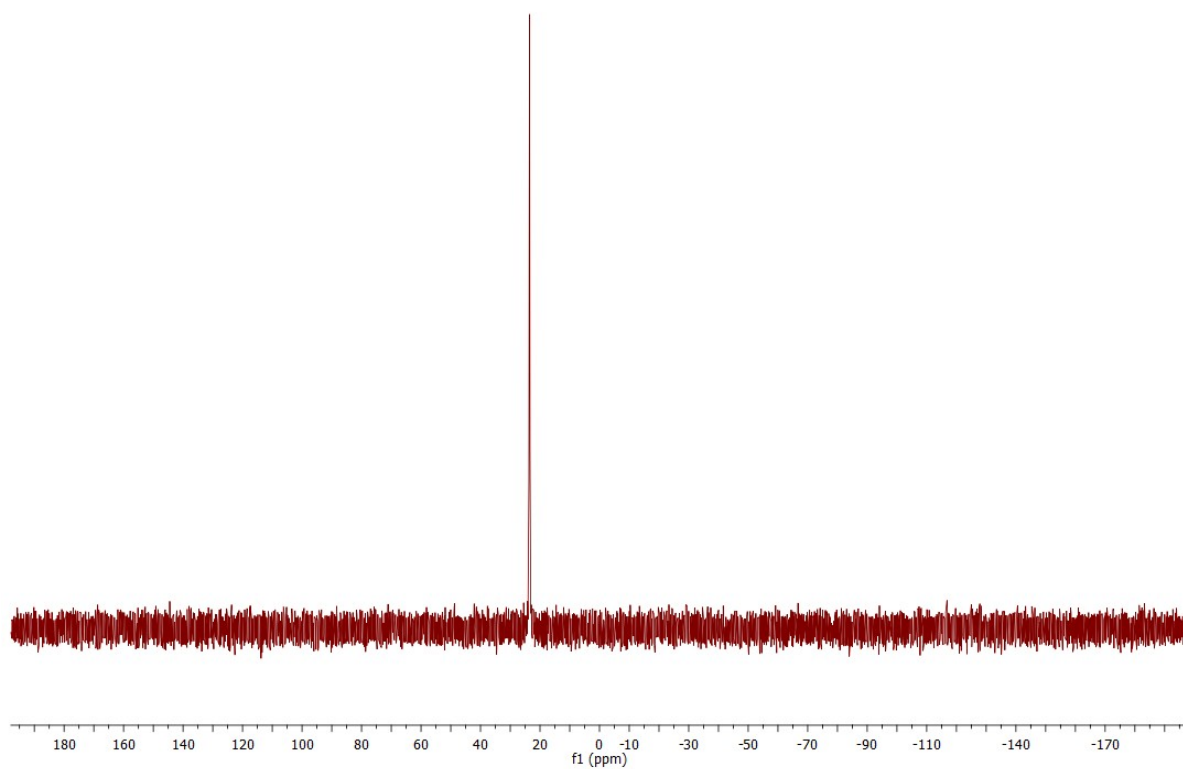

$^1\text{H}$ ,  $^{13}\text{C}$ , and  $^{31}\text{P}$  NMR spectrum of **2**

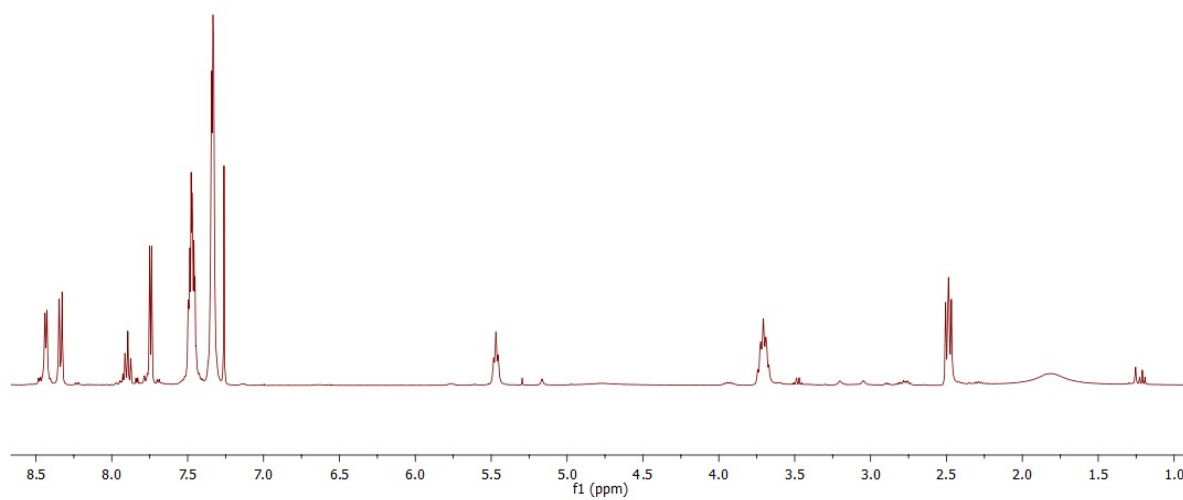

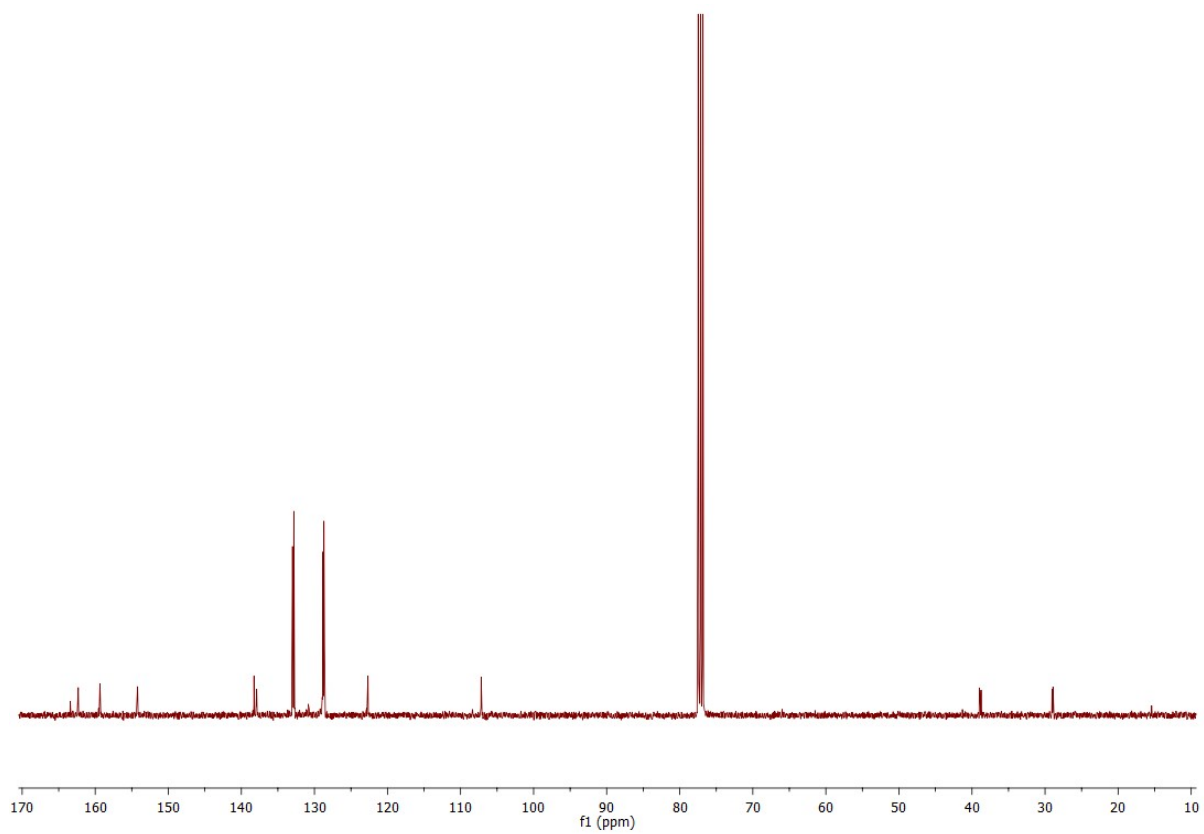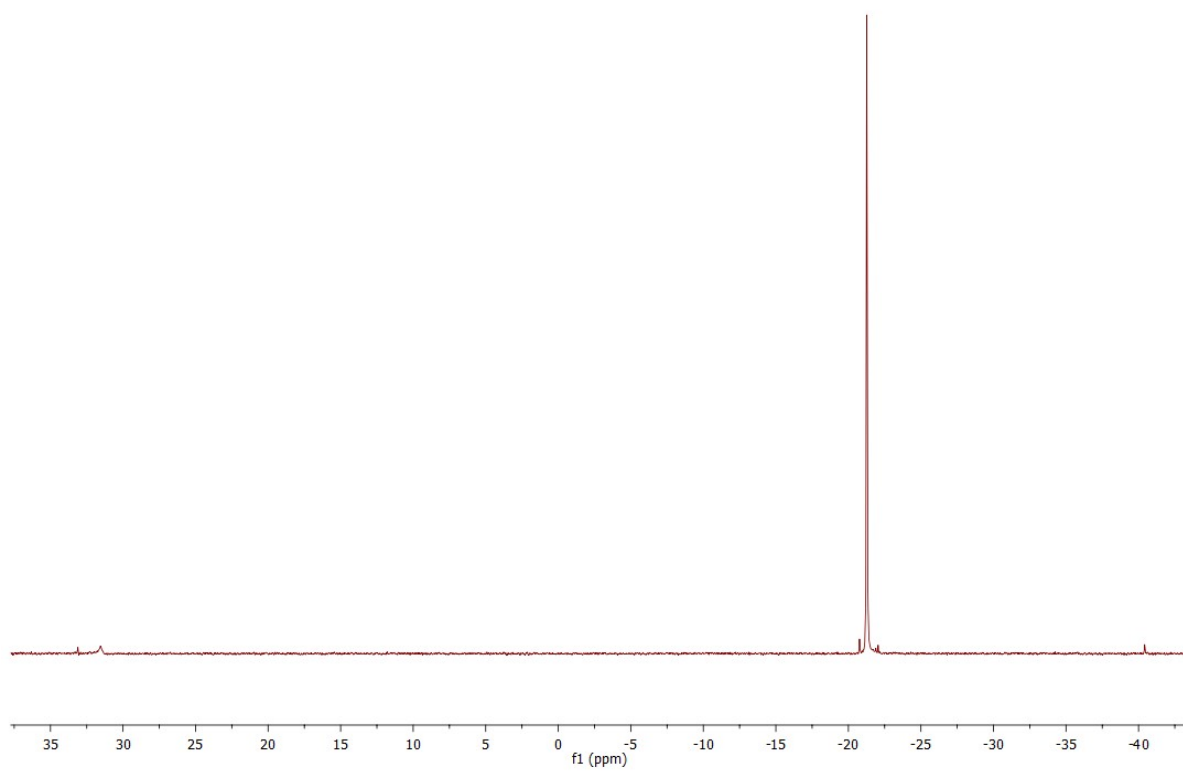

$^1\text{H}$ ,  $^{13}\text{C}$ , and  $^{31}\text{P}$  NMR spectrum of **2Zn**

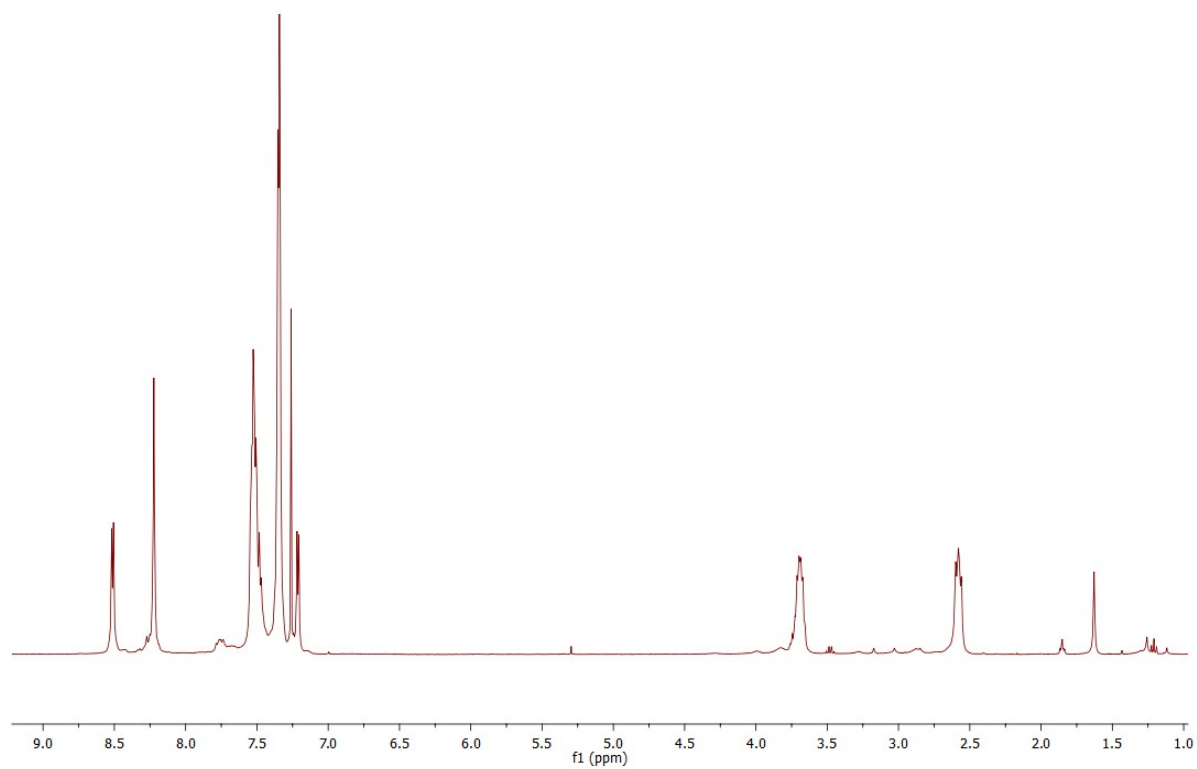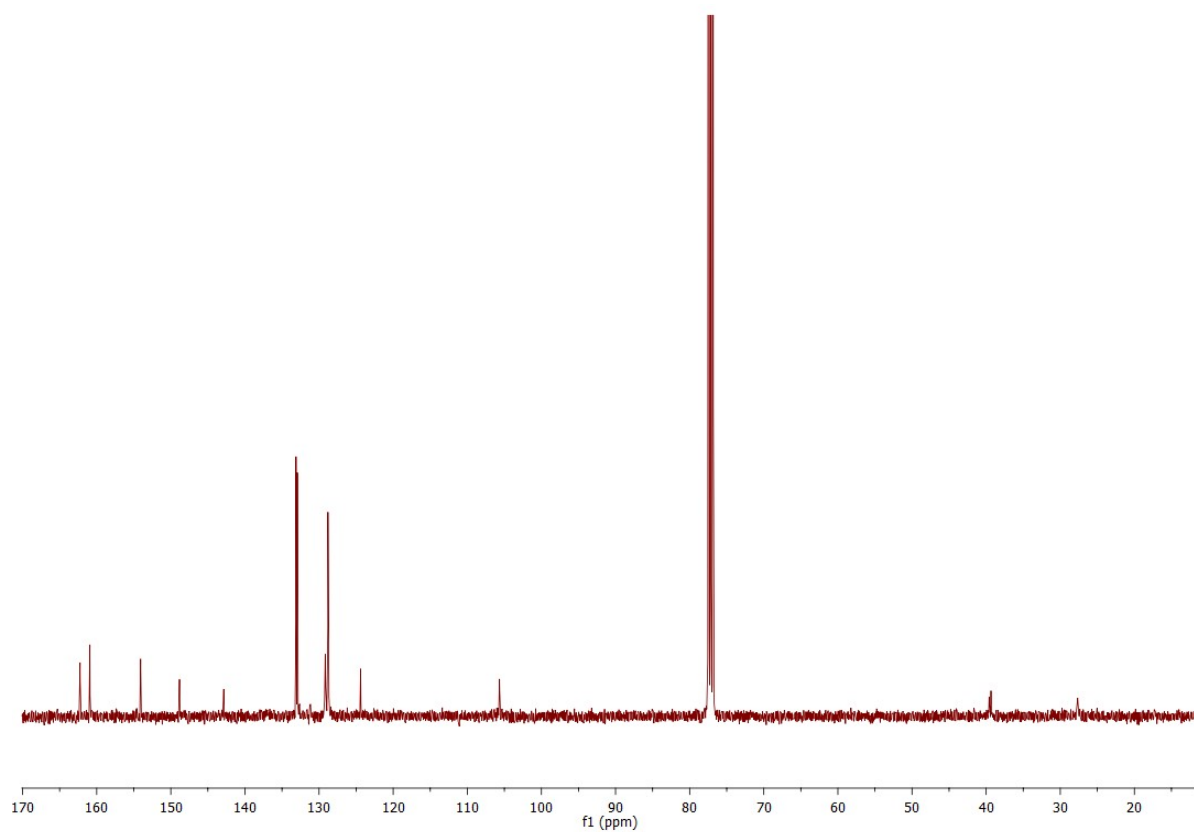

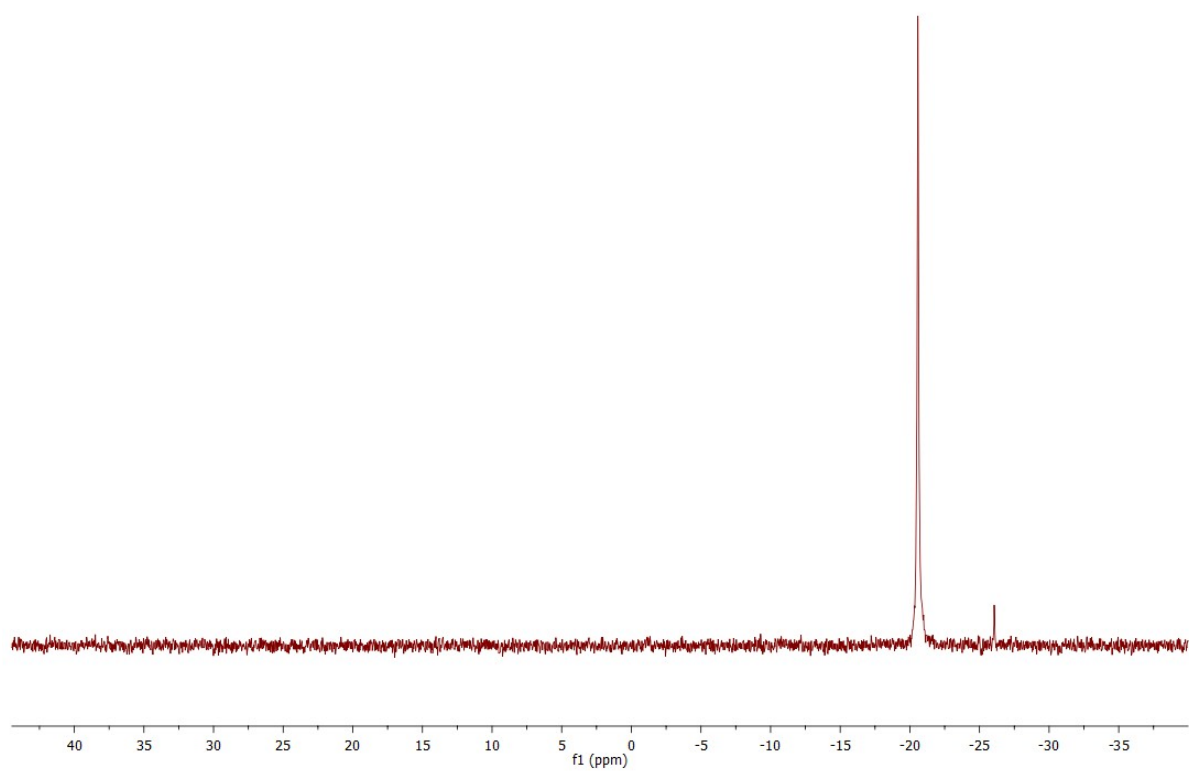

$^1\text{H}$ ,  $^{13}\text{C}$ , and  $^{31}\text{P}$  NMR spectrum of **2Au<sub>2</sub>**

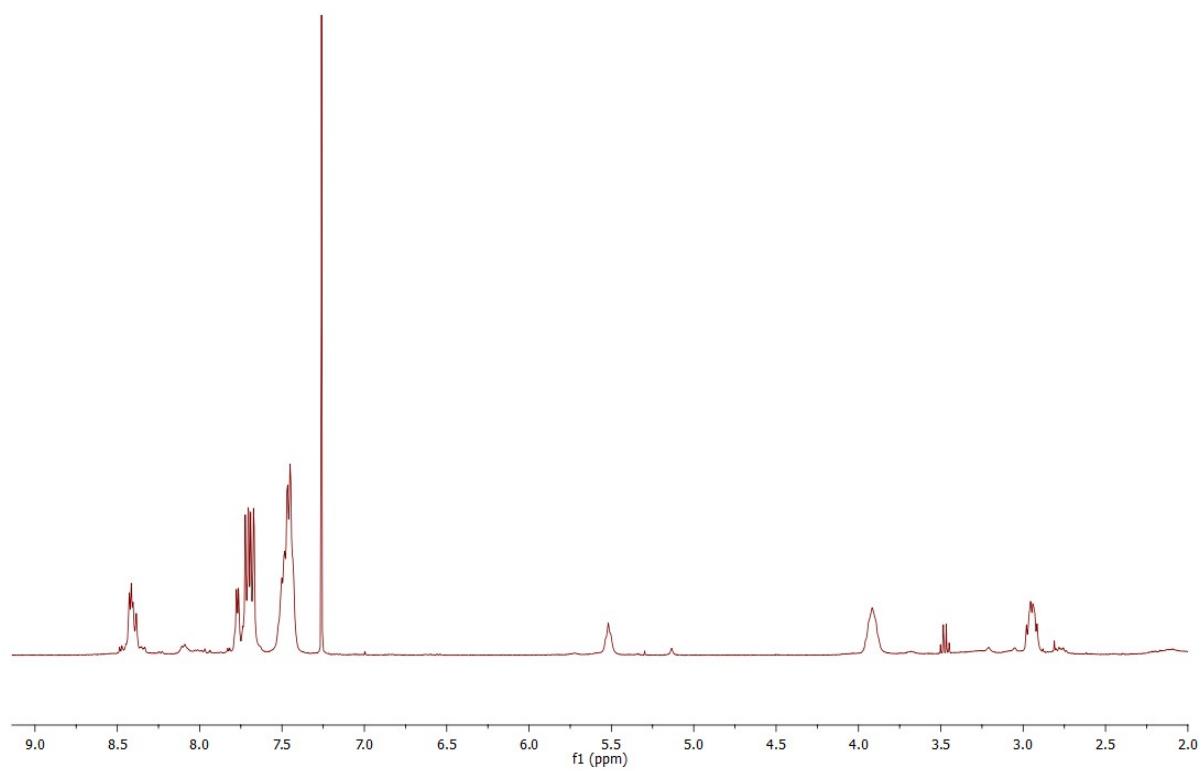



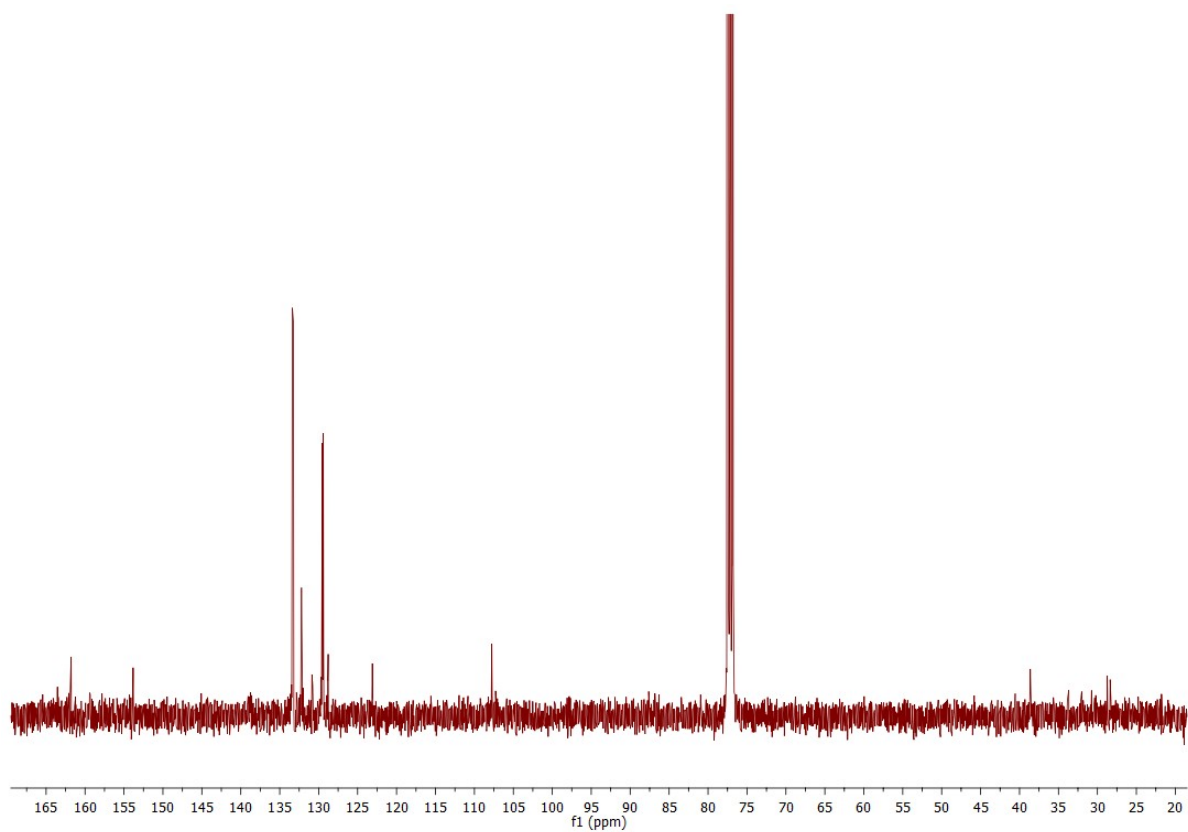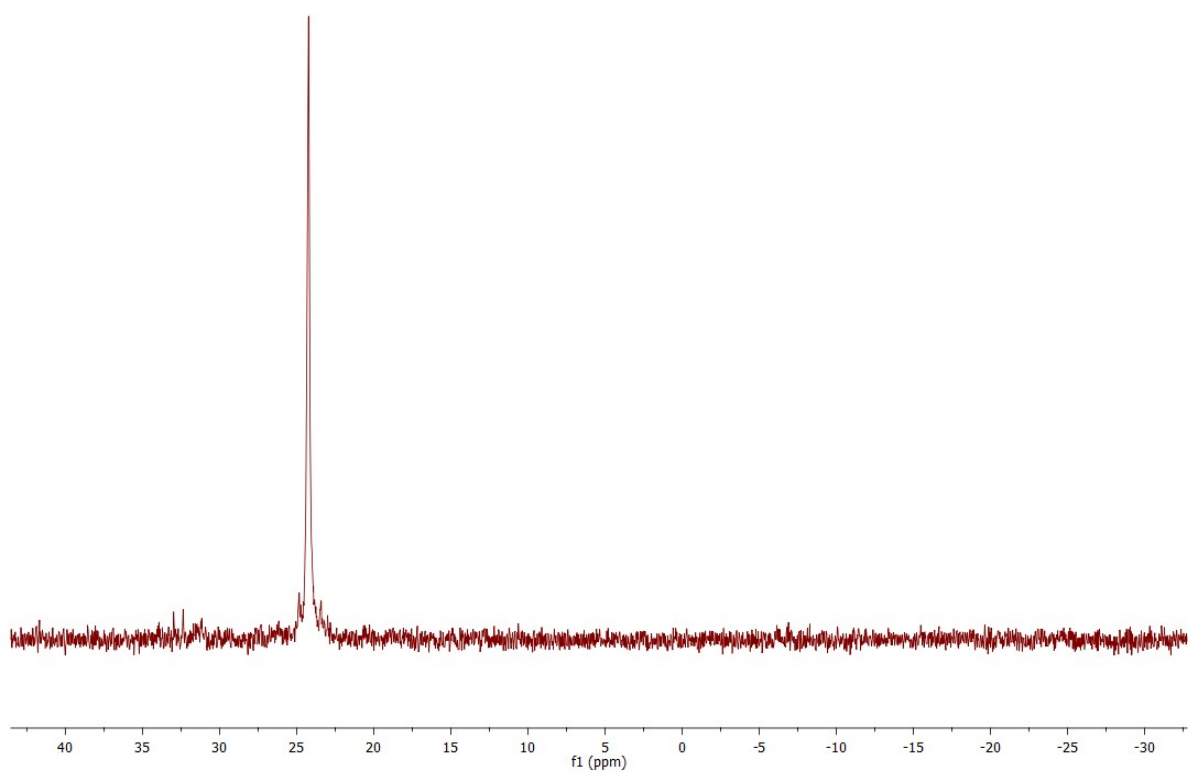

$^1\text{H}$ ,  $^{13}\text{C}$ , and  $^{31}\text{P}$  NMR spectrum of **2Au<sub>2</sub>Zn**

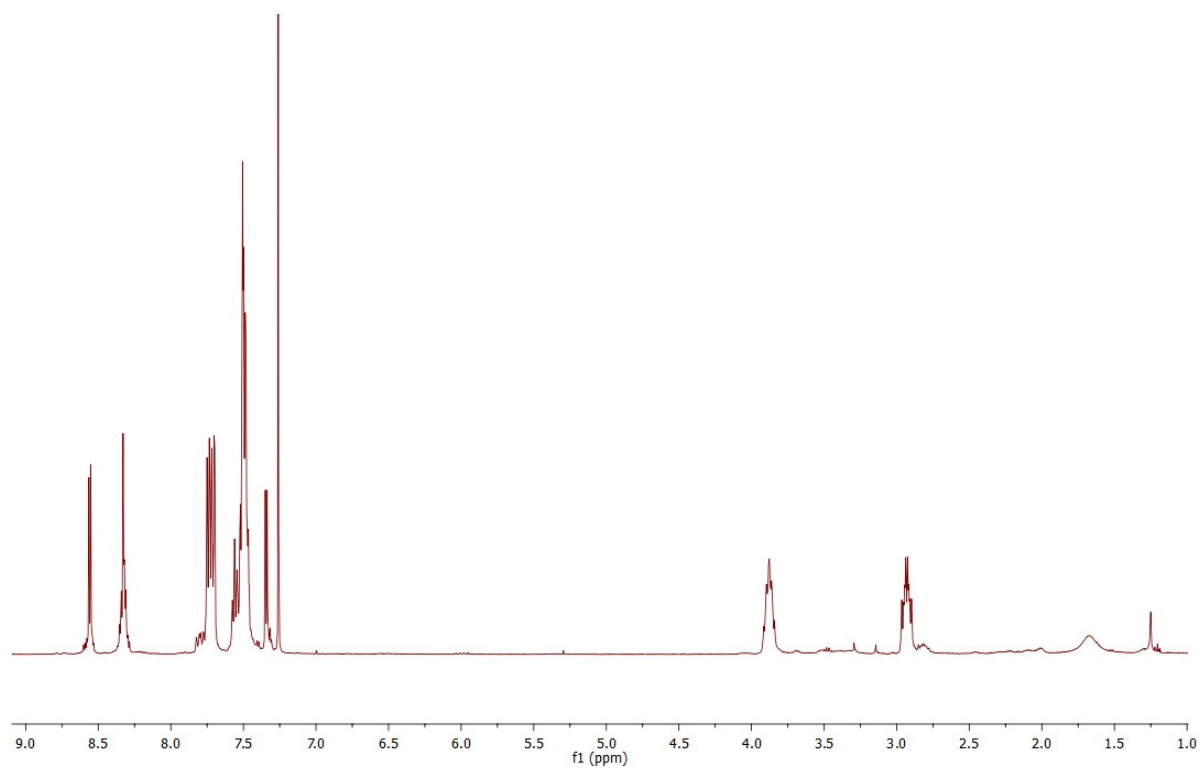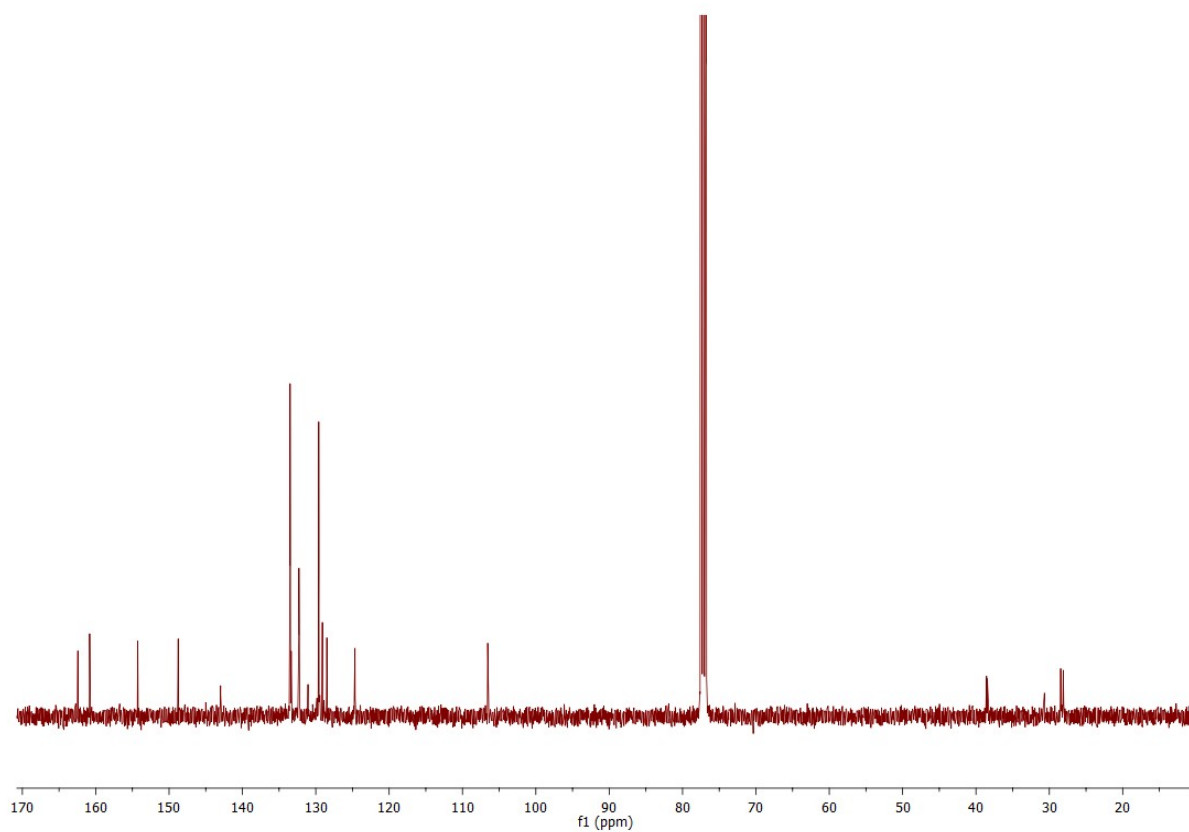

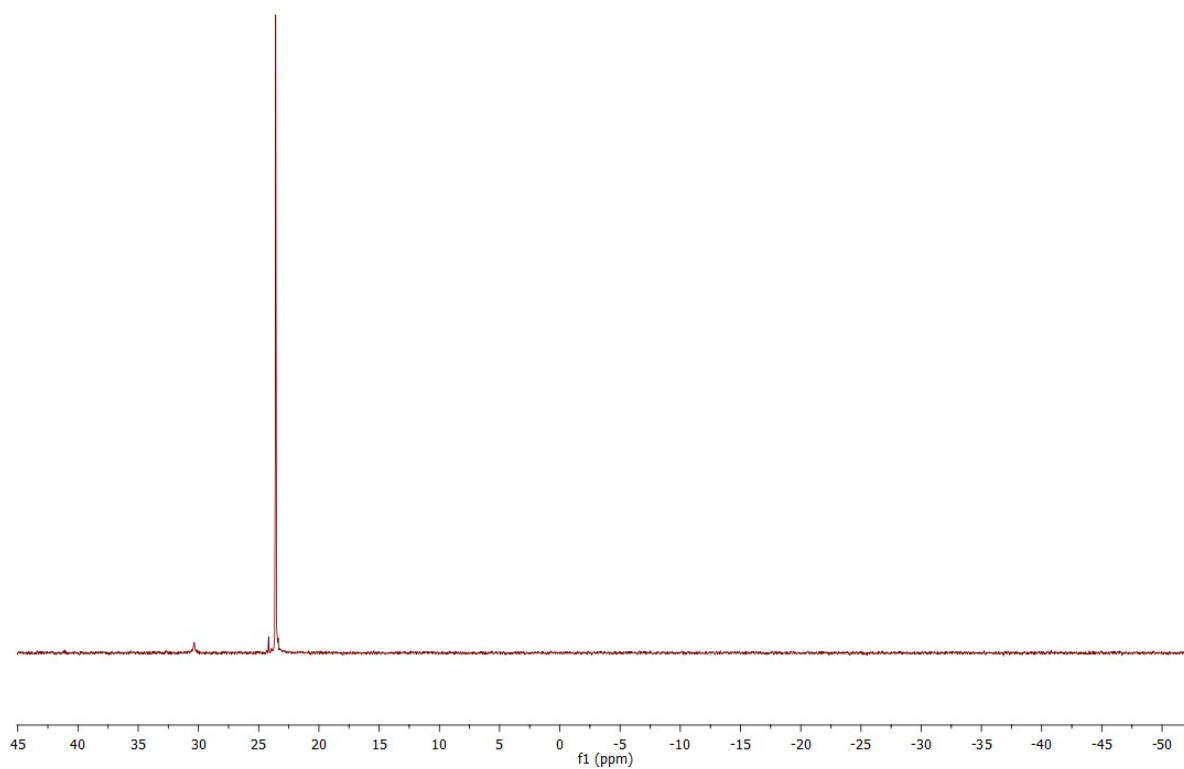

### Measured IR spectra (ATR)

IR spectrum of **1**

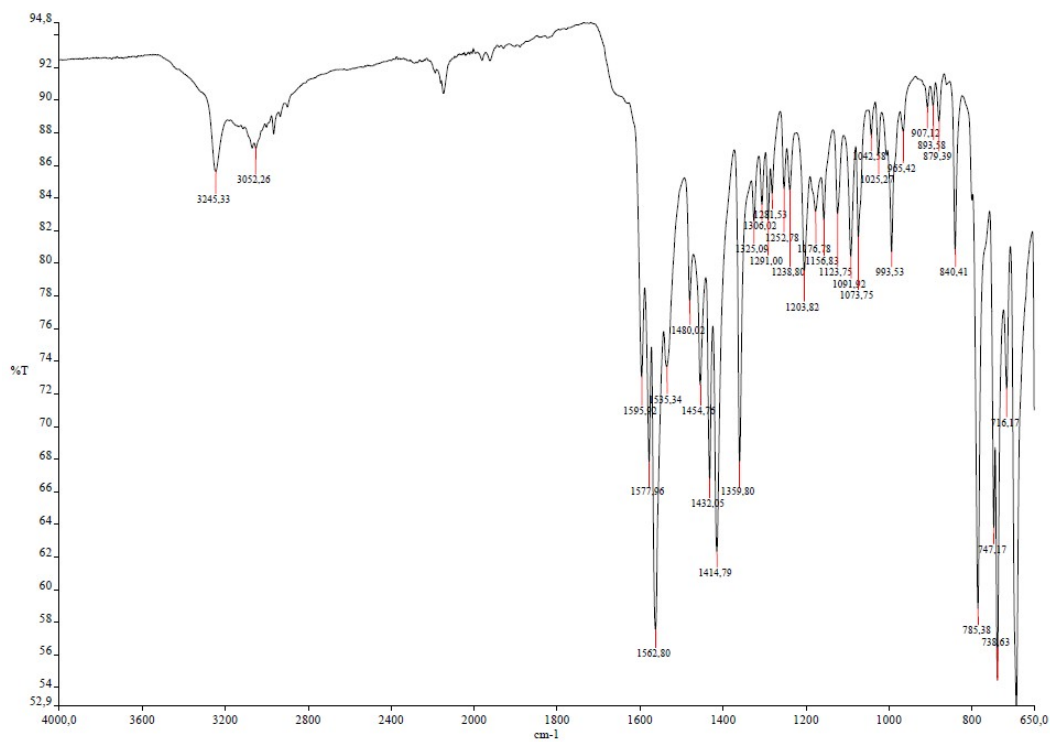

IR spectrum of **1Zn**

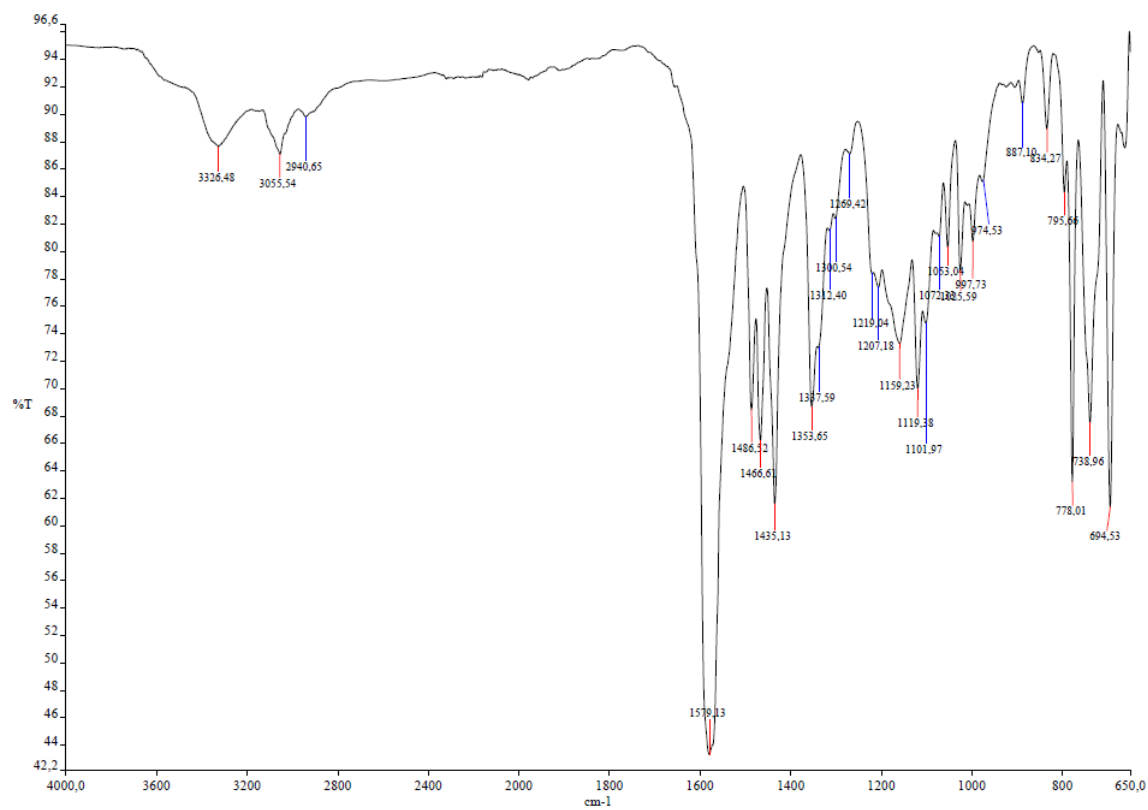

IR spectrum of **1Au**

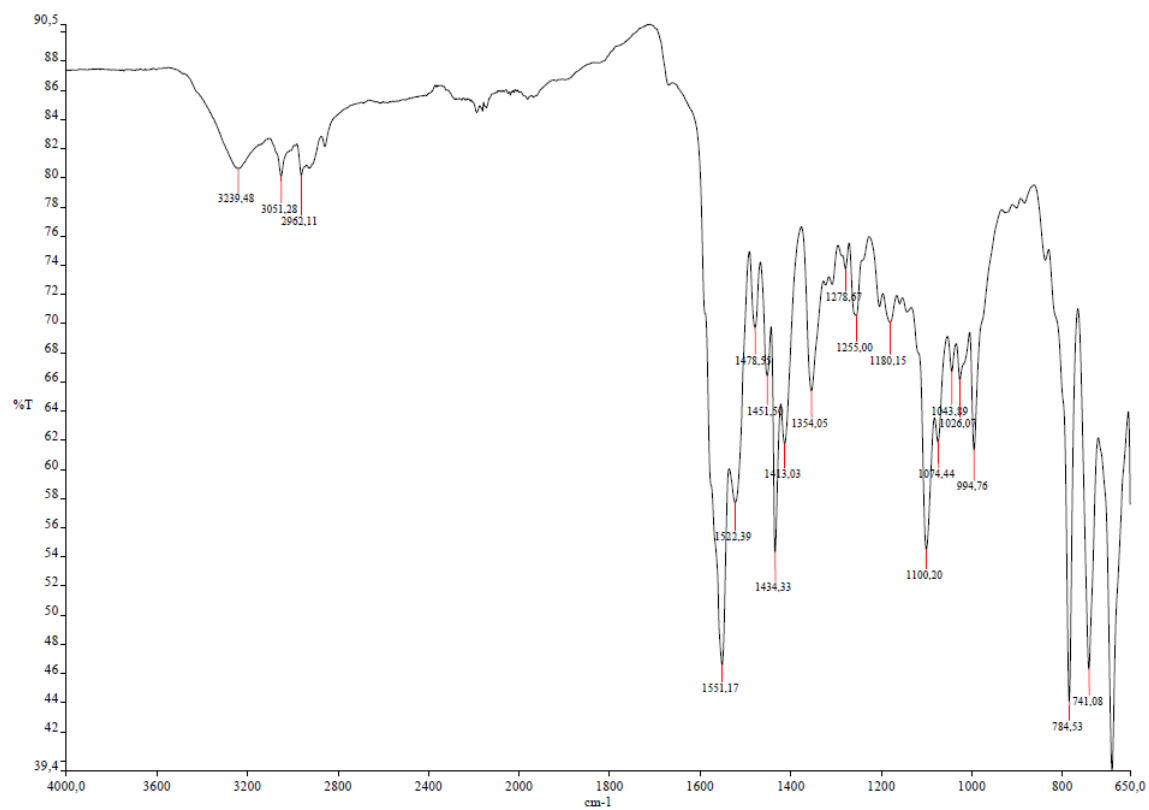

IR spectrum of **1AuZn**

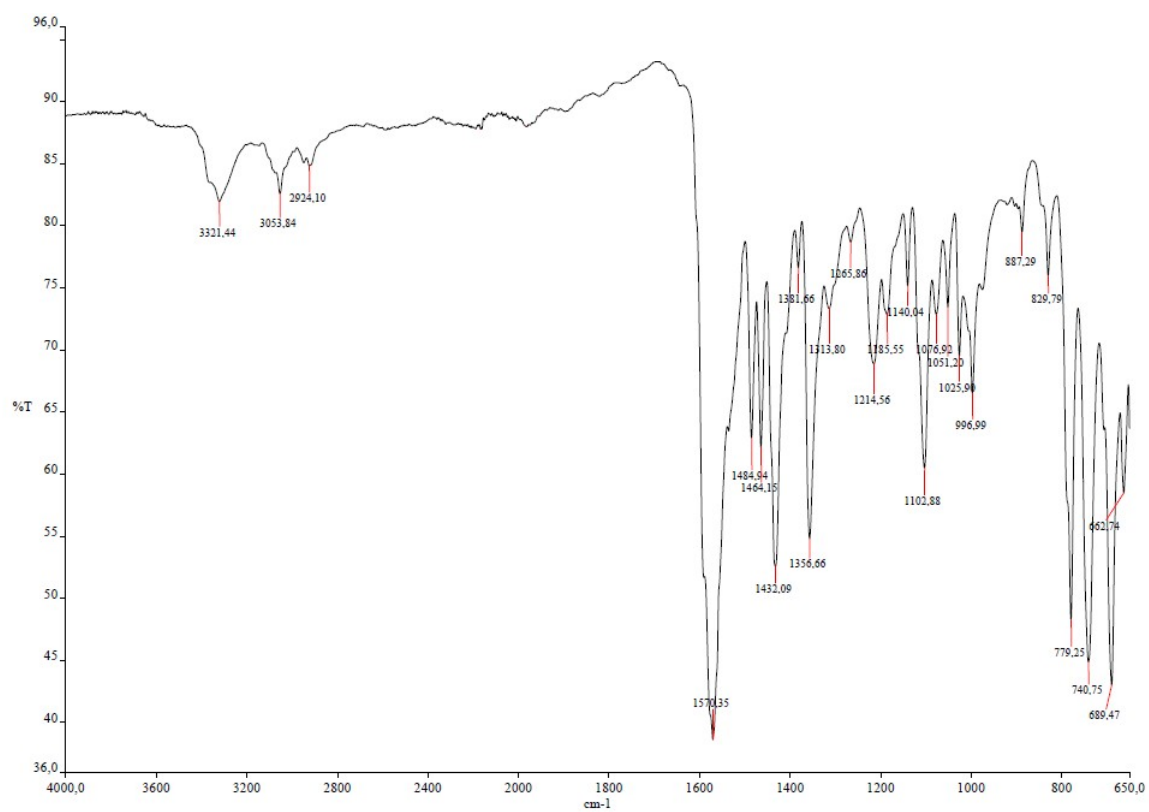

IR spectrum of **2**

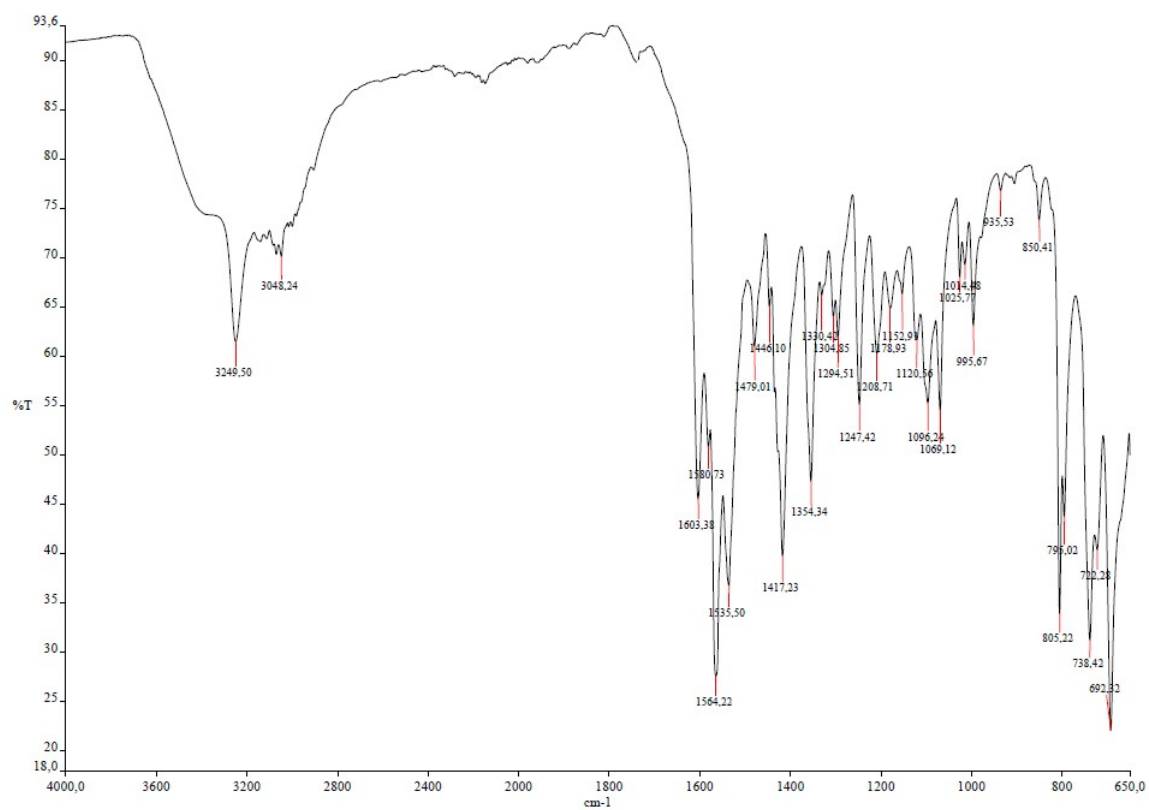

IR spectrum of **2Zn**

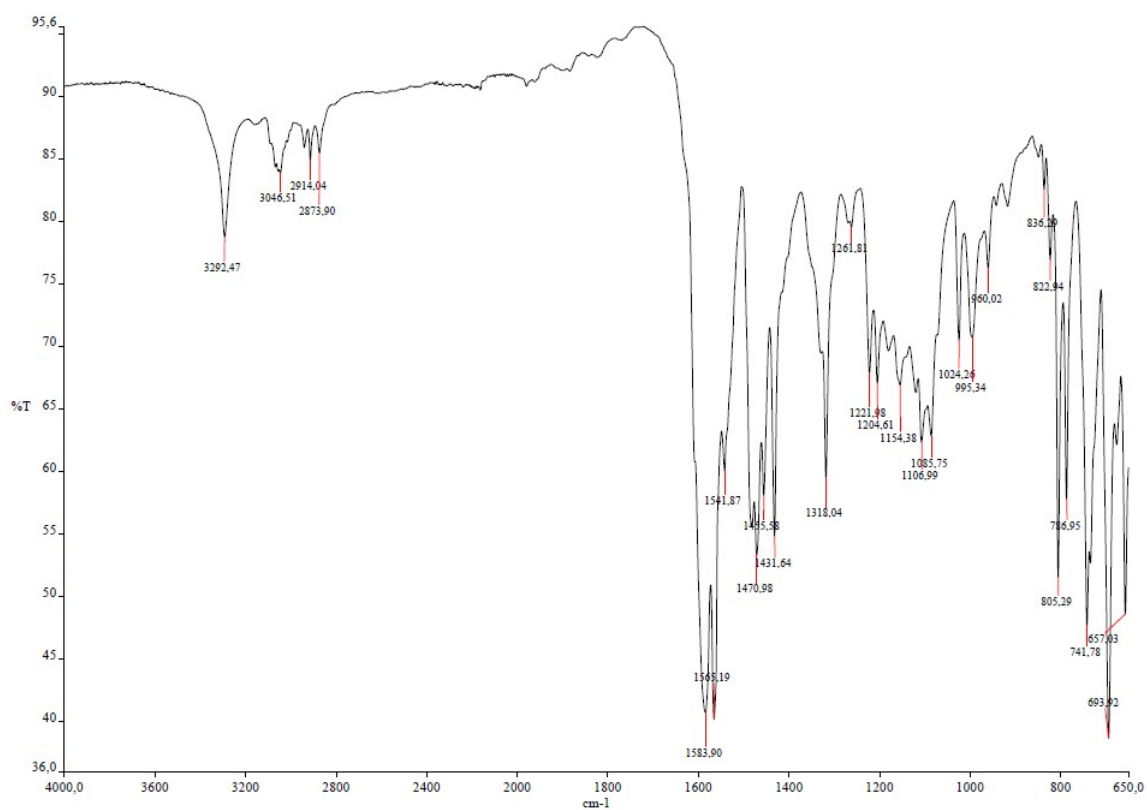

IR spectrum of **2Au<sub>2</sub>**

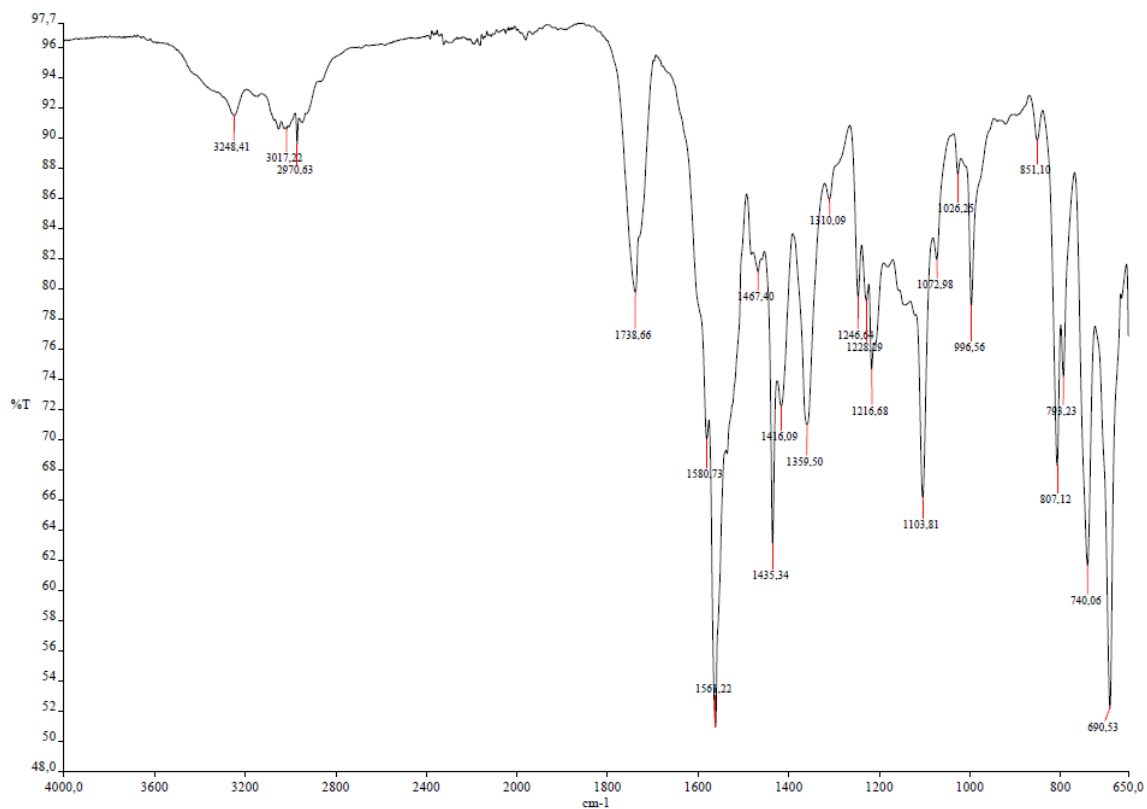

### IR spectrum of **2Au<sub>2</sub>Zn**

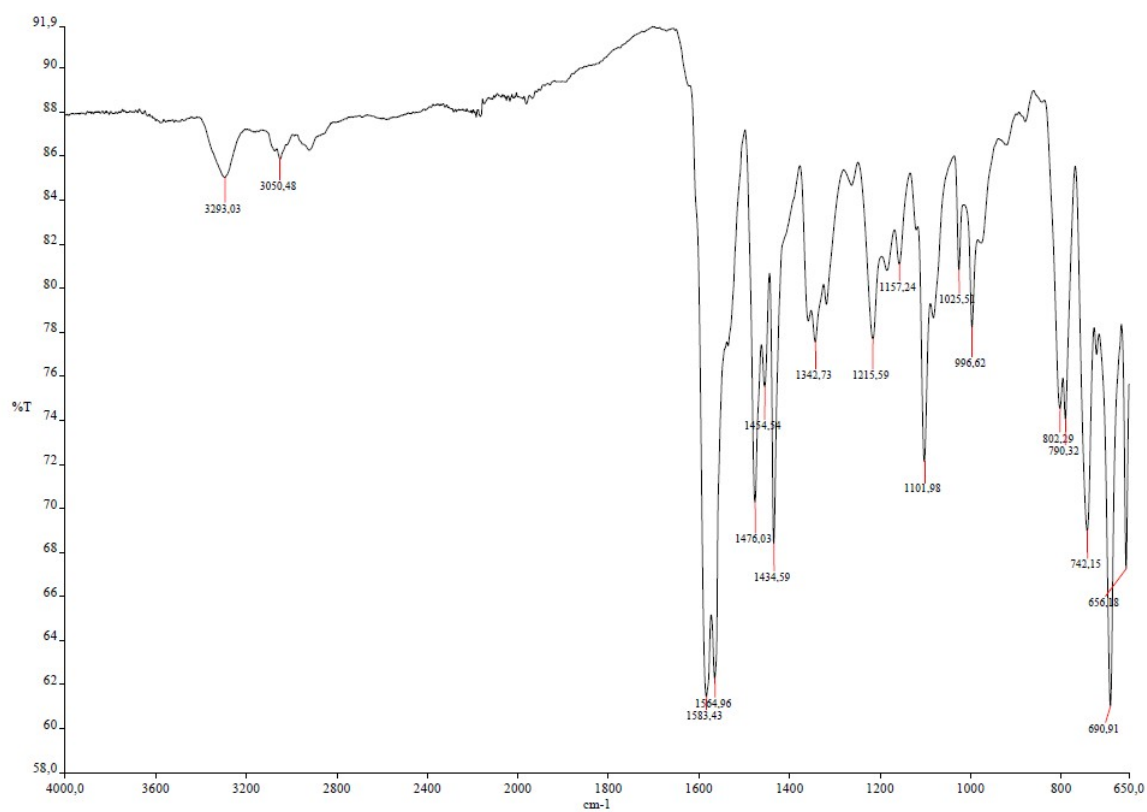

### Measured and simulated ESI spectra

#### ESI spectra of **2Zn**

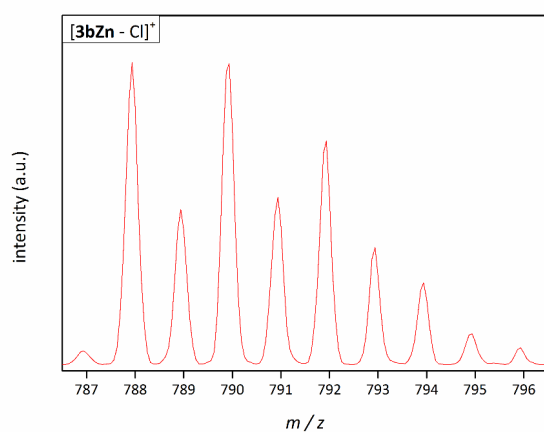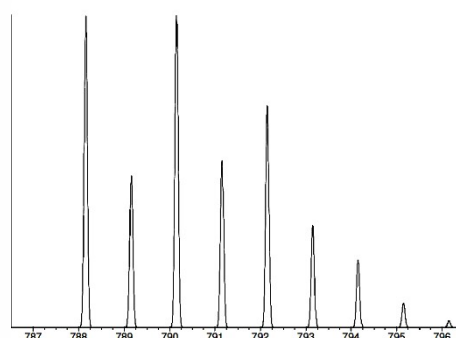

ESI spectra of **2Au<sub>2</sub>**

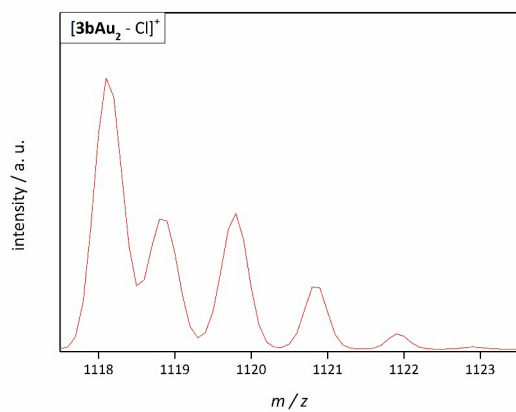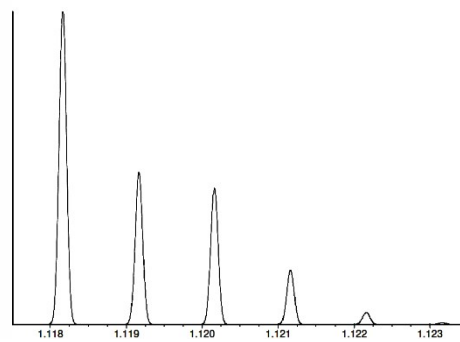

ESI spectra of **2Au<sub>2</sub>Zn**

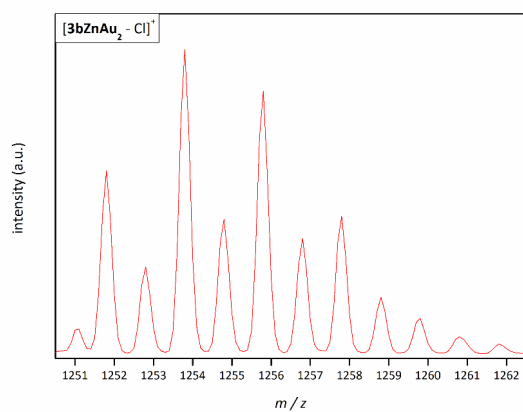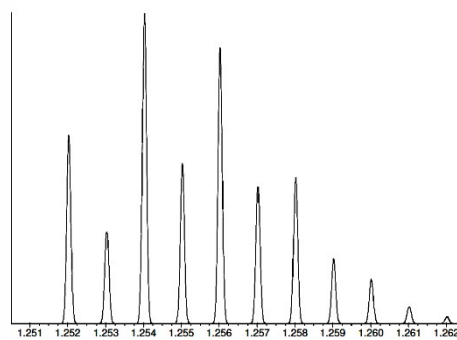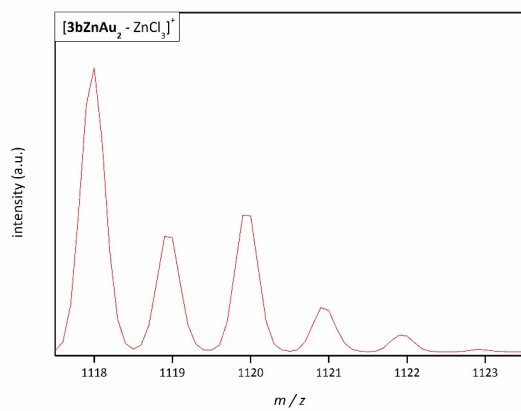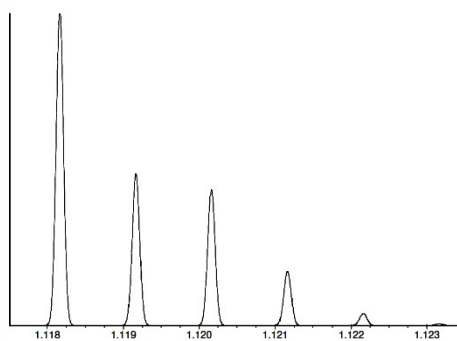



## Crystallographic data

Table S1. Crystallographic data, data collection and refinement.

|                                                                     | <b>1Au</b>                                              | <b>2Au<sub>2</sub>Zn</b>                                                                         |
|---------------------------------------------------------------------|---------------------------------------------------------|--------------------------------------------------------------------------------------------------|
| empirical formula                                                   | C <sub>23</sub> H <sub>21</sub> AuClN <sub>4</sub><br>P | C <sub>45</sub> H <sub>43</sub> Au <sub>2</sub> Cl <sub>4</sub> N <sub>9</sub> P <sub>2</sub> Zn |
| formula weight                                                      | 616.82                                                  | 1372.92                                                                                          |
| crystal size [mm]                                                   | 0.35x0.08x0.04                                          | 0.272x0.114x0.068                                                                                |
| <i>T</i> [K]                                                        | 150(2)                                                  | 150(2)                                                                                           |
| <i>l</i> [Å]                                                        | 0.71073                                                 | 1.54184                                                                                          |
| crystal system                                                      | Triclinic                                               | Triclinic                                                                                        |
| space group                                                         | P-1                                                     | P-1                                                                                              |
| <i>a</i> [Å]                                                        | 10.6195(4)                                              | 11.5397(3)                                                                                       |
| <i>b</i> [Å]                                                        | 12.3785(4)                                              | 14.4235(5)                                                                                       |
| <i>c</i> [Å]                                                        | 18.7756(5)                                              | 15.6048(4)                                                                                       |
| <i>a</i> [°]                                                        | 108.768(3)                                              | 70.951(3)                                                                                        |
| <i>b</i> [°]                                                        | 103.715(3)                                              | 79.619(2)                                                                                        |
| <i>g</i> [°]                                                        | 92.291(3)                                               | 87.626(2)                                                                                        |
| <i>V</i> [Å <sup>3</sup> ]                                          | 2252.05(13)                                             | 2414.47(13)                                                                                      |
| <i>Z</i>                                                            | 4                                                       | 2                                                                                                |
| <i>r</i> <sub>calcd.</sub> [g cm <sup>-3</sup> ]                    | 1.819                                                   | 1.888                                                                                            |
| <i>m</i> [mm <sup>-1</sup> ]                                        | 6.739                                                   | 14.781                                                                                           |
| <i>q</i> -range [°]                                                 | 2.72-32.50                                              | 3.242-62.678                                                                                     |
| refl. coll.                                                         | 29506                                                   | 17276                                                                                            |
| indep. refl.                                                        | 14731<br>[R <sub>int</sub> = 0.0294]                    | 7676<br>[R <sub>int</sub> = 0.0244]                                                              |
| data/restr./param.                                                  | 14731/2/547                                             | 7676/2/576                                                                                       |
| final <i>R</i> indices<br>[ <i>I</i> > 2σ( <i>I</i> )] <sup>a</sup> | 0.0272, 0.0635                                          | 0.0331, 0.0839                                                                                   |
| <i>R</i> indices (all data)                                         | 0.0364, 0.0784                                          | 0.0354, 0.0856                                                                                   |
| <i>Goof</i> <sup>b</sup>                                            | 1.110                                                   | 1.066                                                                                            |
| Δρ <sub>max/min</sub> (e·Å <sup>-3</sup> )                          | 1.741/-2.466                                            | 3.312/-1.223                                                                                     |

<sup>a</sup>  $R1 = \sum ||F_o| - |F_c|| / \sum |F_o|$ ,  $wR2 = [\sum w(F_o^2 - F_c^2)^2 / \sum wF_o^2]^{1/2}$ . <sup>b</sup>  $Goof = [\sum w(F_o^2 - F_c^2)^2 / (n-p)]^{1/2}$ .

## Measured and calculated UV/Vis spectra

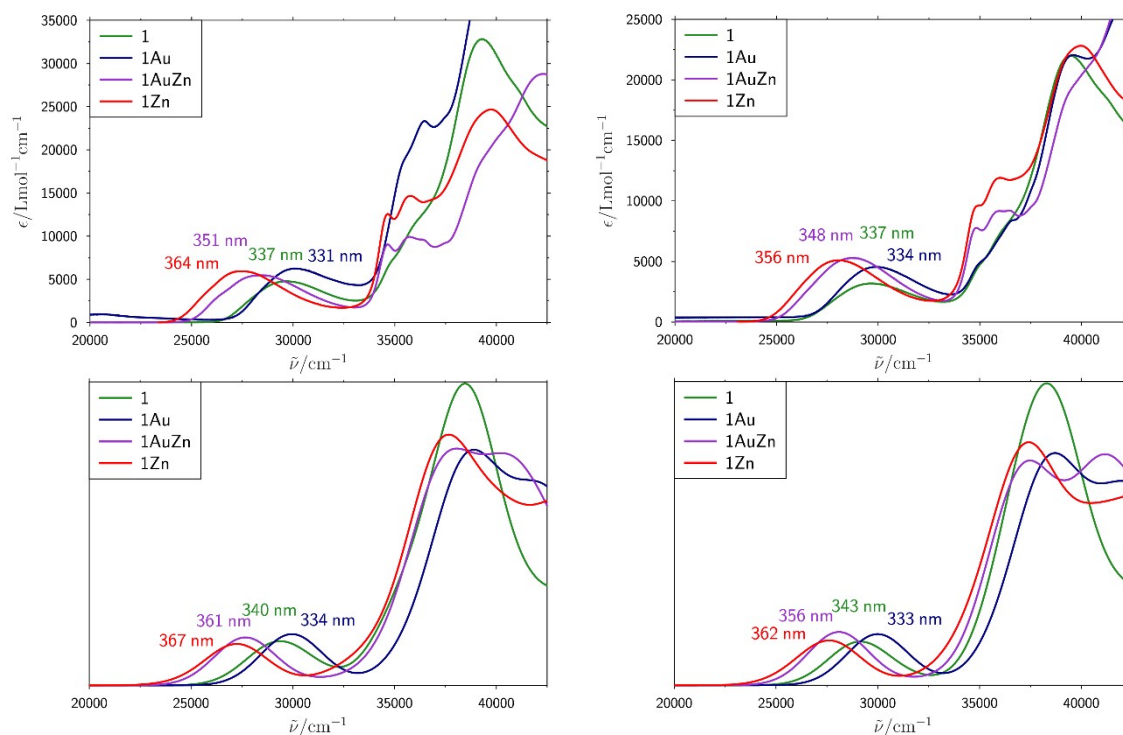

Fig. S1: UV/Vis spectra of compounds **1** (top: measured; bottom: calculated; left: in dichloromethane; right: in acetonitrile).

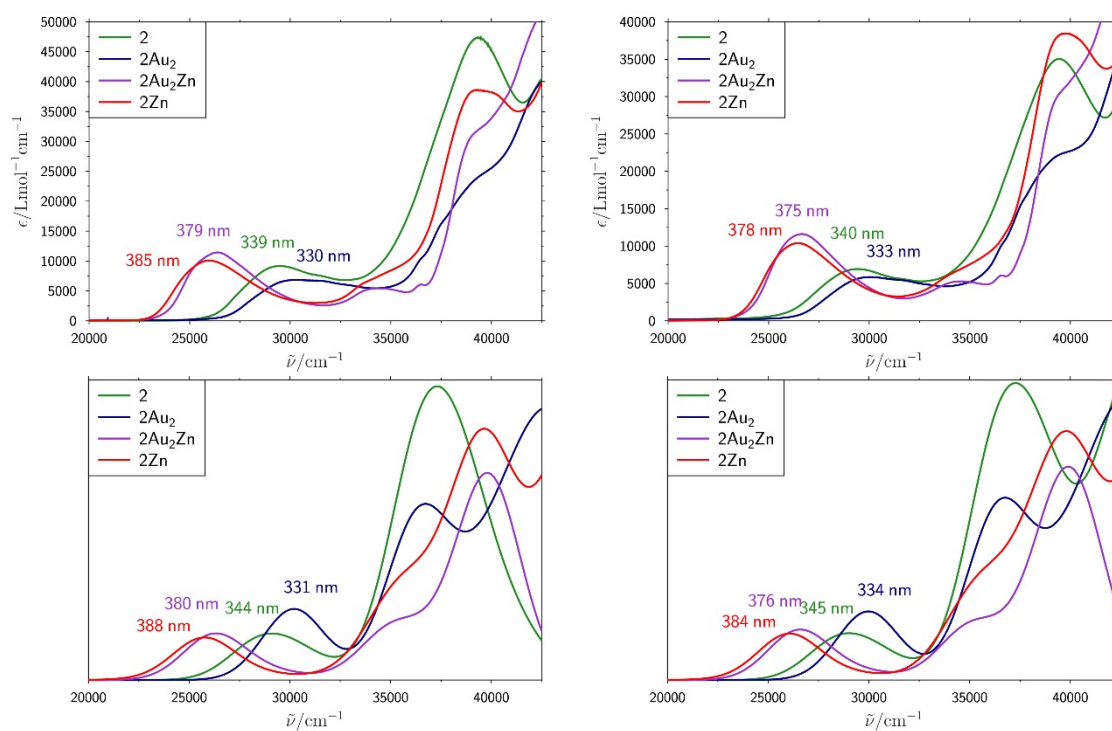

Fig. S2: UV/Vis spectra of compounds **2** (top: measured; bottom: calculated; left: in dichloromethane; right: in acetonitrile).

Table S2. Wavenumber  $\tilde{\nu}$  of the maxima of the pre-band in different solvents.

| substance                | $\tilde{\nu} / \text{cm}^{-1}$ ( $\text{CH}_2\text{Cl}_2$ ) | $\tilde{\nu} / \text{cm}^{-1}$ ( $\text{CHCl}_3$ ) | $\tilde{\nu} / \text{cm}^{-1}$ (MeCN) |
|--------------------------|-------------------------------------------------------------|----------------------------------------------------|---------------------------------------|
| <b>1</b>                 | $29673 \pm 7$                                               | $29574 \pm 15$                                     | $29679 \pm 2$                         |
| <b>1Au</b>               | $30182 \pm 94$                                              | $30018 \pm 10$                                     | $29905 \pm 2$                         |
| <b>1AuZn</b>             | $28456 \pm 45$                                              | $28479 \pm 110$                                    | $28729 \pm 5$                         |
| <b>1Zn</b>               | $27475 \pm 28$                                              | $27370 \pm 40$                                     | $28087 \pm 42$                        |
| <b>2</b>                 | $29489 \pm 2$                                               | $29399 \pm 27$                                     | $29418 \pm 3$                         |
| <b>2Au<sub>2</sub></b>   | $30259 \pm 29$                                              | $30291 \pm 31$                                     | $30052 \pm 13$                        |
| <b>2Au<sub>2</sub>Zn</b> | $26381 \pm 4$                                               | $26194 \pm 2$                                      | $26642 \pm 2$                         |
| <b>2Zn</b>               | $25967 \pm 3$                                               | $25702 \pm 5$                                      | $26457 \pm 2$                         |

### Comparison of fluorescence spectra

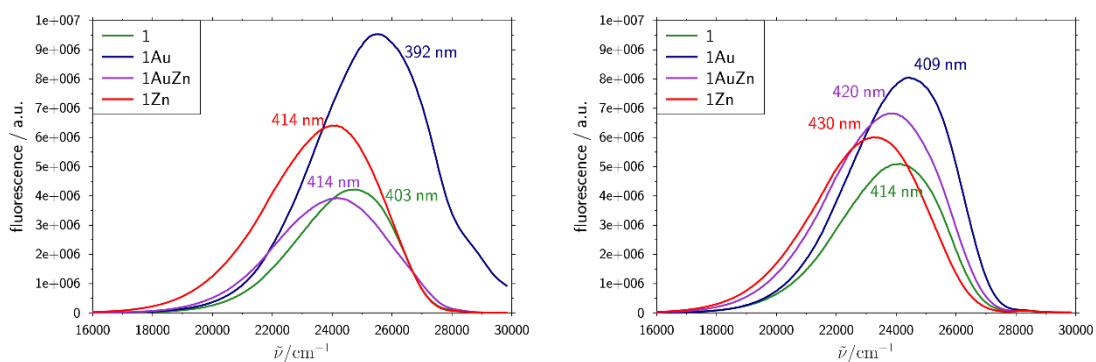

Fig. S3: Fluorescence spectra of compounds **1** (left: in dichloromethane; right: in acetonitrile)

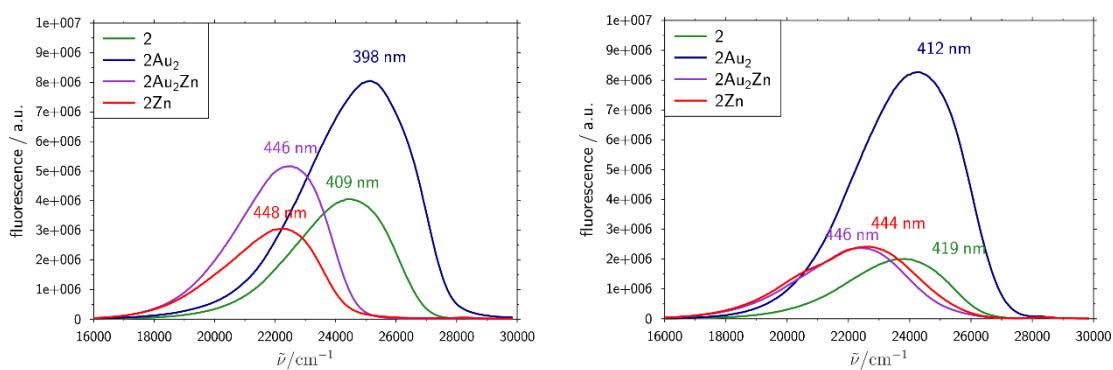

Fig. S4: Fluorescence spectra of compounds **2** (left: in dichloromethane; right: in acetonitrile)

Table S3. Wavenumber  $\tilde{\nu}$  of the maxima of the fluorescence band in different solvents.

| substance                | $\tilde{\nu} / \text{cm}^{-1}$ ( $\text{CH}_2\text{Cl}_2$ ) | $\tilde{\nu} / \text{cm}^{-1}$ ( $\text{CHCl}_3$ ) | $\tilde{\nu} / \text{cm}^{-1}$ (MeCN) |
|--------------------------|-------------------------------------------------------------|----------------------------------------------------|---------------------------------------|
| <b>1</b>                 | 24814                                                       | 24570                                              | 24155                                 |
| <b>1Au</b>               | 25510                                                       | 25126                                              | 24450                                 |
| <b>1AuZn</b>             | 24155                                                       | 24096                                              | 23810                                 |
| <b>1Zn</b>               | 24155                                                       | 23202                                              | 23256                                 |
| <b>2</b>                 | 24450                                                       | 24450                                              | 23866                                 |
| <b>2Au<sub>2</sub></b>   | 25126                                                       | 25063                                              | 24272                                 |
| <b>2Au<sub>2</sub>Zn</b> | 22422                                                       | 22573                                              | 22422                                 |
| <b>2Zn</b>               | 22321                                                       | 22222                                              | 22523                                 |

### Comparison of fluorescence lifetimes

Table S4. Lifetimes in chloroform ( $\lambda_{\text{Ex}} = 293 \text{ nm}$ ), \*\* ( $\lambda_{\text{Ex}} = 313 \text{ nm}$ ).

| substance                | $\tau_1 / \text{ns}$ | $a_1$ | $\tau_2 / \text{ns}$ | $a_2$ | $\tau_3 / \text{ns}$ | $a_3$ | $\chi^2$ | $\langle \tau \rangle_a / \text{ns}$ |
|--------------------------|----------------------|-------|----------------------|-------|----------------------|-------|----------|--------------------------------------|
| <b>1</b>                 | 1.05                 | 0.18  | 0.244                | 0.59  | 3.53                 | 0.23  | 1.36     | 1.15                                 |
| <b>1Au</b>               | 0.439                | 0.41  | 2.10                 | 0.60  |                      |       | 1.04     | 1.43**                               |
| <b>1AuZn</b>             | 0.411                | 0.17  | 1.46                 | 0.77  | 3.18                 | 0.06  | 1.15     | 1.37                                 |
| <b>1Zn</b>               | 1.45                 | 0.39  | 3.56                 | 0.61  |                      |       | 1.05     | 2.73                                 |
| <b>2</b>                 | 0.659                | 0.29  | 2.51                 | 0.71  |                      |       | 1.07     | 1.98                                 |
| <b>2Au<sub>2</sub></b>   | 0.610                | 0.54  | 2.08                 | 0.46  |                      |       | 1.21     | 1.29                                 |
| <b>2Au<sub>2</sub>Zn</b> | 0.864                | 0.68  | 1.92                 | 0.29  | 6.22                 | 0.04  | 1.20     | 1.37                                 |
| <b>2Zn</b>               | 0.616                | 0.05  | 2.92                 | 0.75  | 7.27                 | 0.20  | 1.25     | 3.67                                 |

Table S5. Lifetimes in dichloromethane ( $\lambda_{\text{Ex}} = 293 \text{ nm}$ )

| substance                | $\tau_1 / \text{ns}$ | $a_1$ | $\tau_2 / \text{ns}$ | $a_2$ | $\tau_3 / \text{ns}$ | $a_3$ | $\chi^2$ | $\langle \tau \rangle_a / \text{ns}$ |
|--------------------------|----------------------|-------|----------------------|-------|----------------------|-------|----------|--------------------------------------|
| <b>1</b>                 | 1.66                 | 0.28  | 0.198                | 0.62  | 3.09                 | 0.10  | 1.45     | 0.900                                |
| <b>1Au</b>               | 0.531                | 0.90  | 3.25                 | 0.10  |                      |       | 1.04     | 0.807                                |
| <b>1AuZn</b>             | 0.363                | 0.14  | 0.948                | 0.76  | 5.89                 | 0.10  | 1.04     | 1.35                                 |
| <b>1Zn</b>               | 1.92                 | 0.49  | 6.18                 | 0.51  |                      |       | 1.09     | 4.08                                 |
| <b>2</b>                 | 0.167                | 0.90  | 2.35                 | 0.10  |                      |       | 1.06     | 0.381                                |
| <b>2Au<sub>2</sub></b>   | 0.597                | 0.61  | 2.07                 | 0.39  |                      |       | 1.15     | 1.18                                 |
| <b>2Au<sub>2</sub>Zn</b> | 0.720                | 0.70  | 1.84                 | 0.24  | 5.75                 | 0.06  | 1.19     | 1.29                                 |
| <b>2Zn</b>               | 0.726                | 0.06  | 2.97                 | 0.75  | 7.34                 | 0.20  | 1.17     | 3.71                                 |

Table S6. Lifetimes in acetonitrile ( $\lambda_{Ex} = 293$  nm), \* ( $\lambda_{Ex} = 273$  nm).

| substance                | $\tau_1$ / ns | $a_1$ | $\tau_2$ / ns | $a_2$ | $\tau_3$ / ns | $a_3$ | $\chi^2$ | $\langle\tau\rangle_a$ / ns |
|--------------------------|---------------|-------|---------------|-------|---------------|-------|----------|-----------------------------|
| <b>1</b>                 | 2.11          | 0.15  | 3.65          | 0.42  | 0.274         | 0.44  | 1.14     | 1.95*                       |
| <b>1Au</b>               | 0.395         | 0.18  | 1.25          | 0.75  | 3.77          | 0.07  | 1.15     | 1.26                        |
| <b>1AuZn</b>             | 0.850         | 0.74  | 2.20          | 0.21  | 8.93          | 0.05  | 1.16     | 1.52                        |
| <b>1Zn</b>               | 3.28          | 0.49  | 0.324         | 0.15  | 10.5          | 0.36  | 0.89     | 5.43                        |
| <b>2</b>                 | 2.75          | 0.20  | 0.210         | 0.74  | 5.08          | 0.06  | 1.19     | 1.02                        |
| <b>2Au<sub>2</sub></b>   | 0.462         | 0.30  | 1.19          | 0.64  | 3.90          | 0.05  | 1.06     | 1.11                        |
| <b>2Au<sub>2</sub>Zn</b> | 0.507         | 0.75  | 1.48          | 0.21  | 9.85          | 0.04  | 1.28     | 1.06                        |
| <b>2Zn</b>               | 0.987         | 0.39  | 3.15          | 0.51  | 12.3          | 0.10  | 1.78     | 3.17                        |

Table S7. Luminescence quantum yields estimated from experimental experimental and calculated lifetimes.

| substance                | $\Phi$ (CHCl <sub>3</sub> ) | $\Phi$ (CH <sub>2</sub> Cl <sub>2</sub> ) | $\Phi$ (MeCN) |
|--------------------------|-----------------------------|-------------------------------------------|---------------|
| <b>1</b>                 | 12.31%                      | 9.39%                                     | 19.87%        |
| <b>1Au</b>               | 17.04%                      | 9.32%                                     | 12.84%        |
| <b>1AuZn</b>             | 17.71%                      | 19.06%                                    | 21.33%        |
| <b>1Zn</b>               | 21.70%                      | 36.19%                                    | 50.33%        |
| <b>2</b>                 | 30.24%                      | 5.49%                                     | 12.98%        |
| <b>2Au<sub>2</sub></b>   | 44.91%                      | 36.77%                                    | 28.73%        |
| <b>2Au<sub>2</sub>Zn</b> | 21.06%                      | 20.67%                                    | 17.15%        |
| <b>2Zn</b>               | 39.62%                      | 45.48%                                    | 39.24%        |

### Optimized structure geometries in chloroform

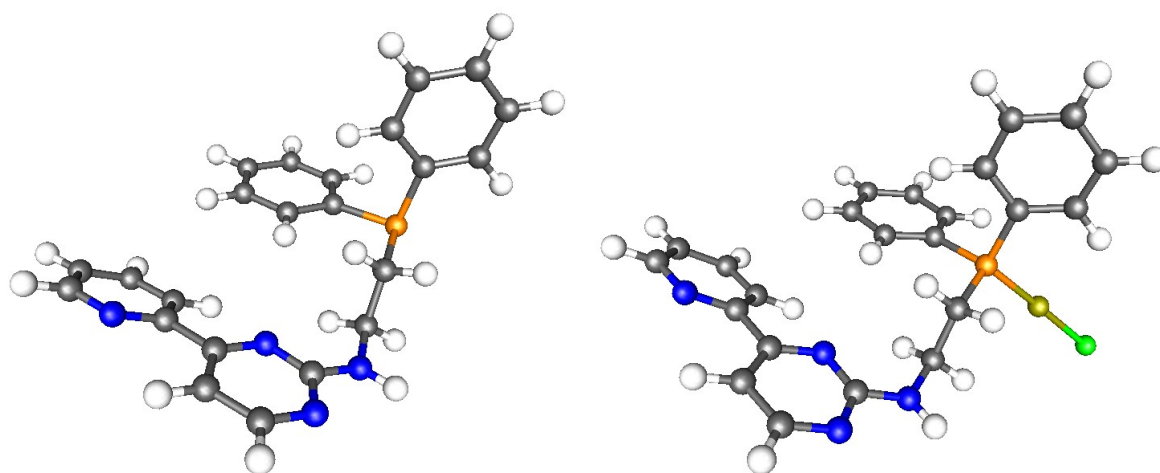

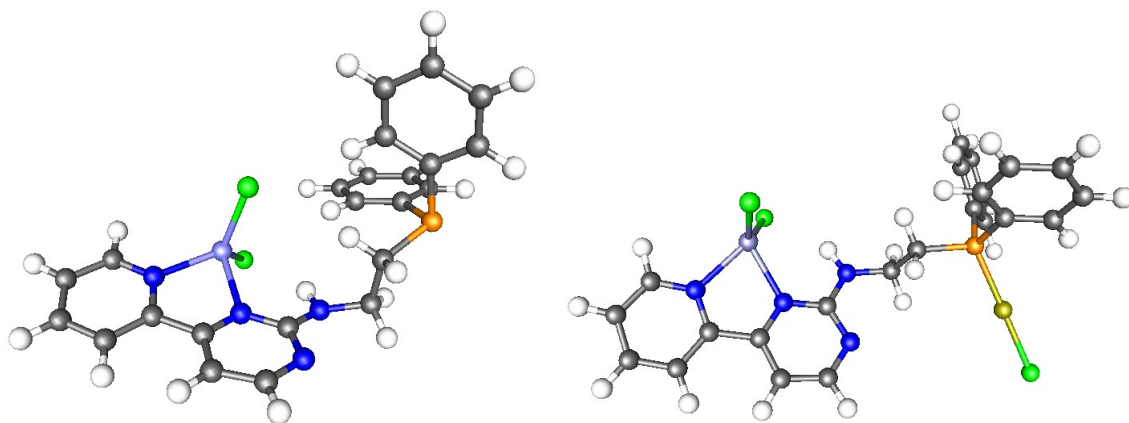

Fig. S5: Geometries of compounds **1**.

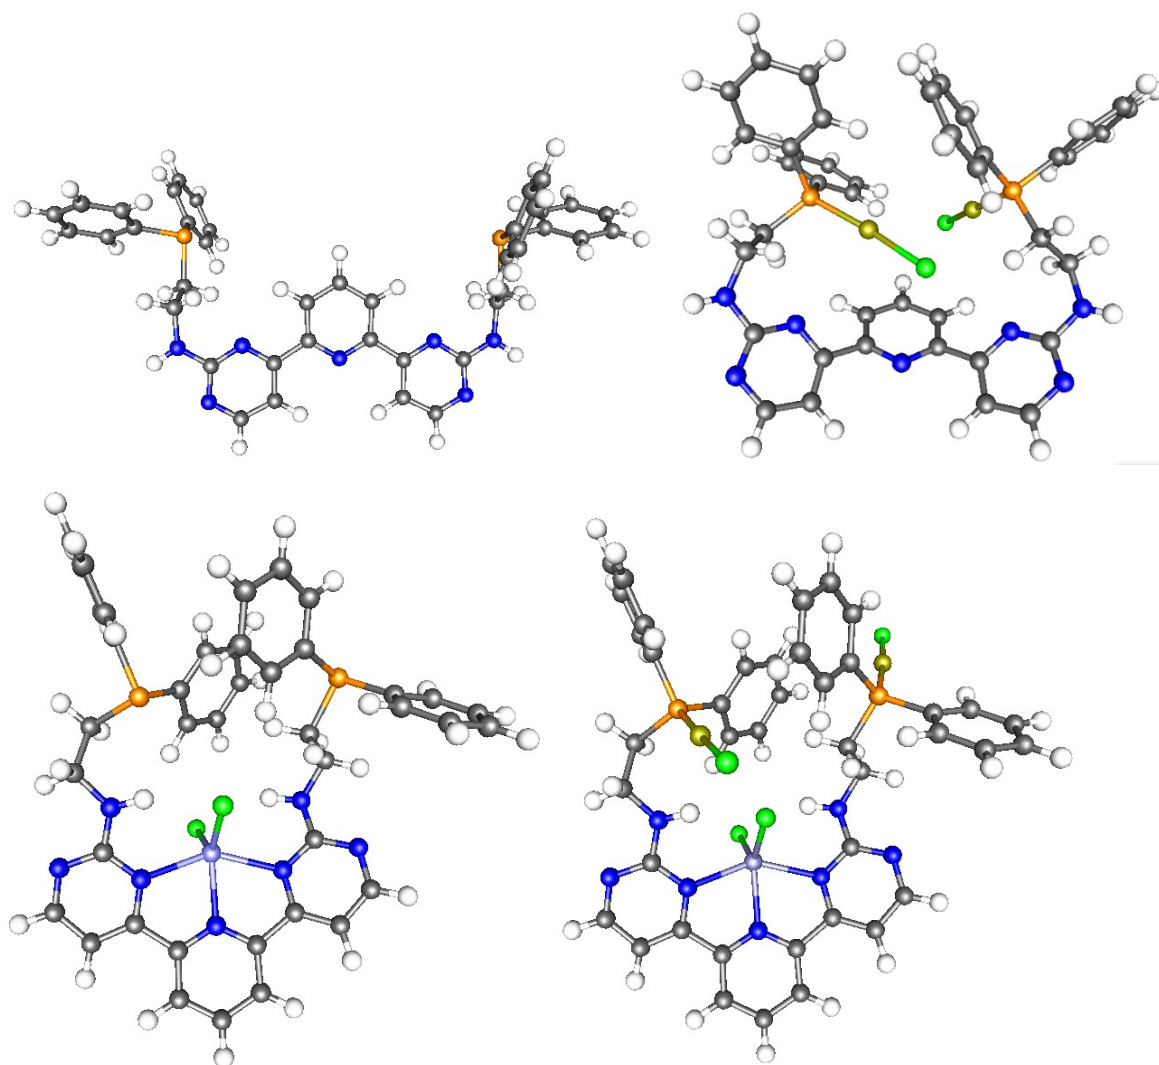

Fig. S6: Geometries of compounds **2**.

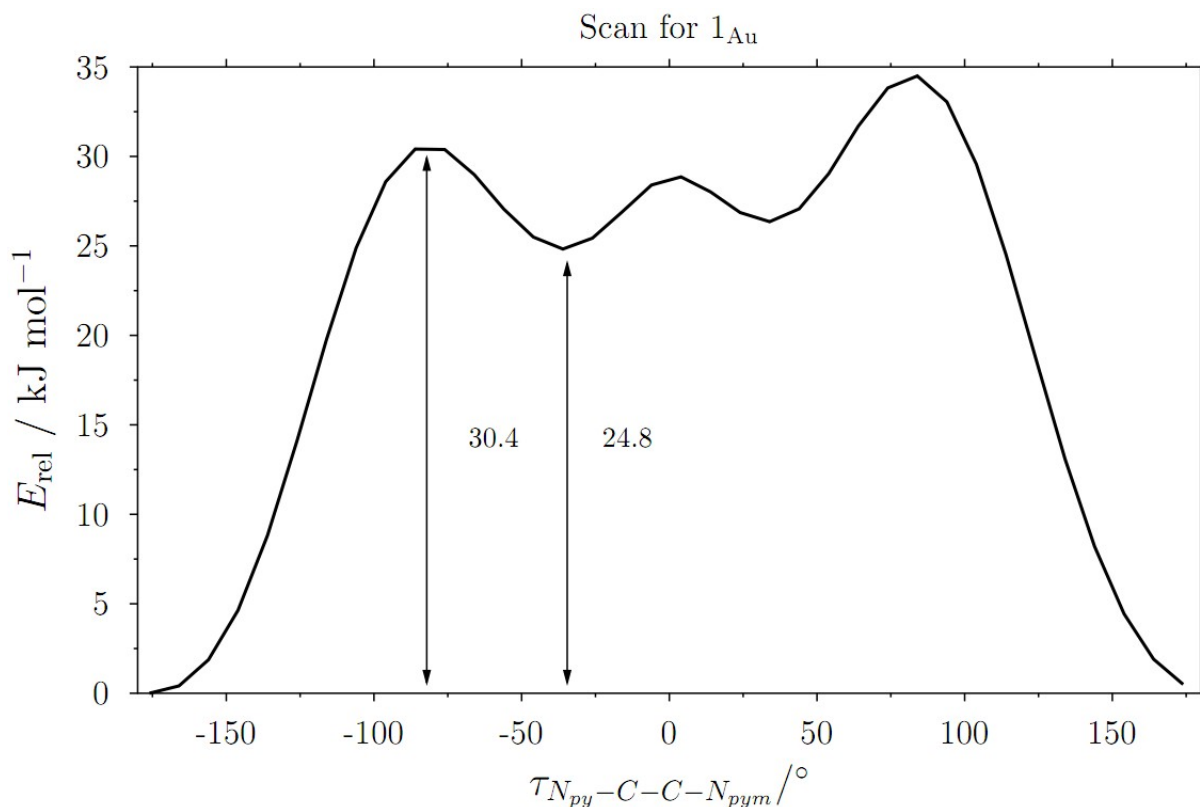

Fig. S7: Potential energy scan for the rotation of the pyrimidine-pyridine bond, calculated for **1Au** at the B3LYP-D3/def2-TZVP level.

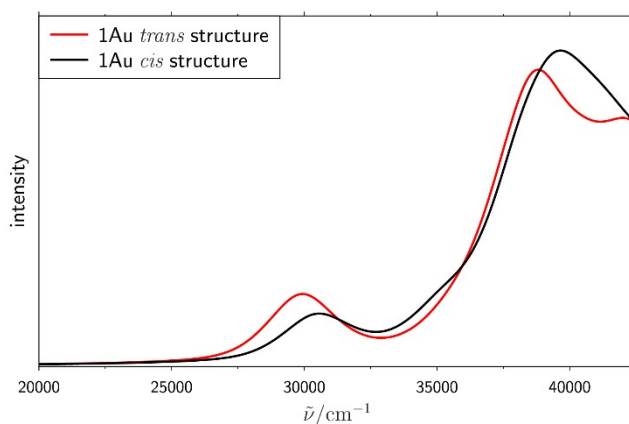

Fig. S8: Comparison of the calculated UV/Vis-spectra of the *trans* and *cis* conformer of **1Au** in  $\text{CHCl}_3$ .

Remark: Theoretical investigations are also performed for other metal ions substituting the zinc in complex **1AuZn**. By using magnesium, calcium and cadmium the effect of the ion radius and a possible influence of d-electrons is analyzed. The results are shown in Fig. S9. The spectra for magnesium, calcium and zinc show no significant differences with respect to the first electronic transition. Furthermore, the difference for cadmium is also very small. This leads to the conclusion that the transition is only influenced by the charge of the ion and the resulting coordination.

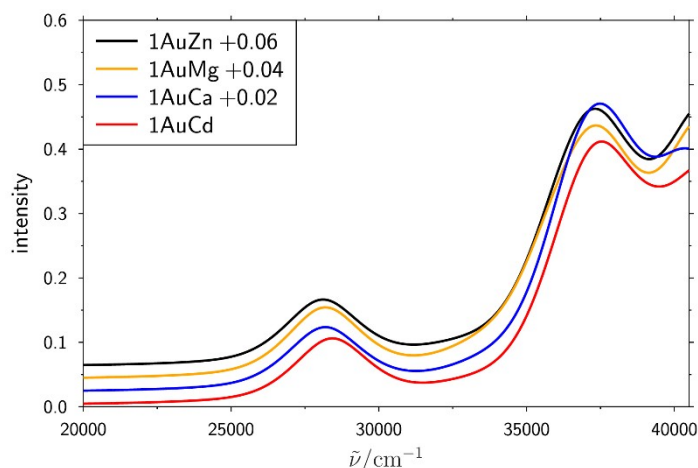

Fig. S9: Comparison of **1Au** with different metal chlorides calculated in acetonitrile.

### Dipole moments

Table S8. Comparison of calculated dipole moments in Debye, at the level B3LYP-D3/def2-TZVP.

|                                 | <b>1</b> | <b>1Au</b>             | <b>1AuZn</b>             | <b>1Zn</b> |
|---------------------------------|----------|------------------------|--------------------------|------------|
| CHCl <sub>3</sub>               | 2.82     | 11.73                  | 9.58                     | 12.80      |
| CH <sub>2</sub> Cl <sub>2</sub> | 3.01     | 12.20                  | 10.02                    | 13.28      |
| MeCN                            | 3.20     | 12.67                  | 10.47                    | 13.75      |
|                                 | <b>2</b> | <b>2Au<sub>2</sub></b> | <b>2Au<sub>2</sub>Zn</b> | <b>2Zn</b> |
| CHCl <sub>3</sub>               | 1.94     | 7.03                   | 15.54                    | 12.43      |
| CH <sub>2</sub> Cl <sub>2</sub> | 1.94     | 7.91                   | 16.29                    | 13.32      |
| MeCN                            | 1.93     | 8.62                   | 17.03                    | 14.26      |

### Data of the first four transitions

Table S9. Overview for **1** in CHCl<sub>3</sub>.

| Excitation Nr.             | 1                | 2                | 3               | 4                |
|----------------------------|------------------|------------------|-----------------|------------------|
| Energy/cm <sup>-1</sup>    | 29025            | 31162            | 31885           | 35260            |
| Oszillator strength        | 7.79E-02         | 6.83E-03         | 3.92E-03        | 3.42E-04         |
| Orbitals & contribution    | 101 -> 102 95.0% | 100 -> 102 87.1% | 99 -> 102 86.5% | 93 -> 102 91.4 % |
| transition dipole moment/D | 2.40             | 0.68             | 0.51            | 0.15             |

Table S10. Overview for **1** in CH<sub>2</sub>Cl<sub>2</sub>.

| Excitation Nr.             | 1                | 2                | 3               | 4               |
|----------------------------|------------------|------------------|-----------------|-----------------|
| Energy/cm <sup>-1</sup>    | 29030            | 31225            | 31981           | 35352           |
| Oszillator strength        | 7.74E-02         | 6.72E-03         | 3.91E-03        | 2.92E-04        |
| Orbitals & contribution    | 101 -> 102 95.2% | 100 -> 102 88.2% | 99 -> 102 86.6% | 93 -> 102 91.6% |
| transition dipole moment/D | 2.39             | 0.68             | 0.51            | 0.13            |



Table S11. Overview for **1** in MeCN.

| Excitation Nr.             | 1                | 2                                  | 3                                  | 4               |
|----------------------------|------------------|------------------------------------|------------------------------------|-----------------|
| Energy/cm <sup>-1</sup>    | 29037            | 31284                              | 32073                              | 35438           |
| Oszillator strength        | 7.68E-02         | 6.63E-03                           | 3.92E-03                           | 2.42E-04        |
| Orbitals & contribution    | 101 -> 102 95.3% | 100 -> 102 89.2%<br>99 -> 102 7.5% | 99 -> 102 85.0%<br>100 -> 102 8.0% | 93 -> 102 91.7% |
| transition dipole moment/D | 2.38             | 0.67                               | 0.51                               | 0.12            |

Table S12. Overview for **1Au** in CHCl<sub>3</sub>.

| Excitation Nr.             | 1                | 2                | 3                                    | 4                |
|----------------------------|------------------|------------------|--------------------------------------|------------------|
| Energy/cm <sup>-1</sup>    | 29694            | 31987            | 35216                                | 35418            |
| Oszillator strength        | 9.13E-02         | 3.26E-03         | 8.29E-04                             | 3.18E-02         |
| Orbitals & contribution    | 119 -> 120 97.5% | 118 -> 120 93.2% | 111 -> 120 71.3%<br>112 -> 120 22.8% | 119 -> 121 98.4% |
| transition dipole moment/D | 2.57             | 0.47             | 0.23                                 | 1.38             |

Table S13. Overview for **1Au** in CH<sub>2</sub>Cl<sub>2</sub>.

| Excitation Nr.             | 1                | 2                                   | 3                                   | 4                |
|----------------------------|------------------|-------------------------------------|-------------------------------------|------------------|
| Energy/cm <sup>-1</sup>    | 29706            | 32088                               | 35317                               | 35554            |
| Oszillator strength        | 9.06E-02         | 3.33E-03                            | 7.58E-04                            | 3.31E-02         |
| Orbitals & contribution    | 119 -> 120 97.5% | 118 -> 120 89.7%<br>117 -> 120 6.5% | 111 -> 120 81.6%<br>113 -> 120 9.5% | 119 -> 121 98.3% |
| transition dipole moment/D | 2.56             | 0.47                                | 0.22                                | 1.40             |

Table S14. Overview for **1Au** in MeCN.

| Excitation Nr.             | 1                | 2                                    | 3                                    | 4                |
|----------------------------|------------------|--------------------------------------|--------------------------------------|------------------|
| Energy/cm <sup>-1</sup>    | 29721            | 32184                                | 35414                                | 35697            |
| Oszillator strength        | 9.00E-02         | 3.40E-03                             | 6.81E-04                             | 3.45E-02         |
| Orbitals & contribution    | 119 -> 120 97.4% | 118 -> 120 55.3%<br>117 -> 120 40.4% | 112 -> 120 53.6%<br>113 -> 120 33.0% | 119 -> 121 98.2% |
| transition dipole moment/D | 2.55             | 0.47                                 | 0.20                                 | 1.43             |

Table S15. Overview for **1AuZn** in CHCl<sub>3</sub>.

| Excitation Nr.             | 1                | 2                                    | 3                | 4                                    |
|----------------------------|------------------|--------------------------------------|------------------|--------------------------------------|
| Energy/cm <sup>-1</sup>    | 27729            | 31523                                | 32817            | 33460                                |
| Oszillator strength        | 1.10E-01         | 7.15E-03                             | 5.47E-04         | 2.40E-03                             |
| Orbitals & contribution    | 151 -> 152 97.6% | 145 -> 152 48.1%<br>143 -> 152 27.5% | 150 -> 152 98.8% | 143 -> 152 46.9%<br>145 -> 152 27.2% |
| transition dipole moment/D | 2.91             | 0.70                                 | 0.19             | 0.40                                 |

Table S16. Overview for **1AuZn** in CH<sub>2</sub>Cl<sub>2</sub>.

| Excitation Nr.             | 1                | 2                | 3                | 4                |
|----------------------------|------------------|------------------|------------------|------------------|
| Energy/cm <sup>-1</sup>    | 27979            | 32080            | 33472            | 34872            |
| Oszillator strength        | 1.18E-01         | 8.81E-03         | 2.08E-03         | 5.21E-03         |
| Orbitals & contribution    | 151 -> 152 97.6% | 144 -> 152 68.5% | 150 -> 152 98.7% | 143 -> 152 74.9% |
| transition dipole moment/D | 3.00             | 0.77             | 0.36             | 0.57             |

Table S17. Overview for **1AuZn** in MeCN.

| Excitation Nr.             | 1                | 2                | 3                | 4                |
|----------------------------|------------------|------------------|------------------|------------------|
| Energy/cm <sup>-1</sup>    | 28218            | 32539            | 34006            | 35752            |
| Oszillator strength        | 1.27E-01         | 1.04E-02         | 3.09E-03         | 4.80E-05         |
| Orbitals & contribution    | 151 -> 152 97.5% | 144 -> 152 74.6% | 150 -> 152 98.7% | 149 -> 152 99.8% |
| transition dipole moment/D | 3.10             | 0.83             | 0.44             | 0.05             |

Table S18. Overview for **1Zn** in CHCl<sub>3</sub>.

| Excitation Nr.             | 1                | 2                | 3                | 4                |
|----------------------------|------------------|------------------|------------------|------------------|
| Energy/cm <sup>-1</sup>    | 25262            | 27426            | 30294            | 30859            |
| Oszillator strength        | 4.68E-03         | 7.10E-02         | 7.14E-04         | 8.18E-04         |
| Orbitals & contribution    | 133 -> 134 97.6% | 132 -> 134 94.8% | 131 -> 134 98.2% | 130 -> 134 97.0% |
| transition dipole moment/D | 0.63             | 2.35             | 0.22             | 0.24             |

Table S19. Overview for **1Zn** in CH<sub>2</sub>Cl<sub>2</sub>.

| Excitation Nr.             | 1                | 2                | 3                | 4                |
|----------------------------|------------------|------------------|------------------|------------------|
| Energy/cm <sup>-1</sup>    | 26317            | 27944            | 31379            | 32005            |
| Oszillator strength        | 1.13E-02         | 7.30E-02         | 9.83E-04         | 1.27E-03         |
| Orbitals & contribution    | 133 -> 134 94.2% | 132 -> 134 92.2% | 131 -> 134 97.1% | 130 -> 134 81.2% |
| transition dipole moment/D | 0.96             | 2.36             | 0.26             | 0.29             |

Table S20. Overview for **1Zn** in MeCN.

| Excitation Nr.             | 1                | 2                | 3                | 4                |
|----------------------------|------------------|------------------|------------------|------------------|
| Energy/cm <sup>-1</sup>    | 27242            | 28538            | 32391            | 32679            |
| Oszillator strength        | 2.89E-02         | 6.47E-02         | 2.57E-03         | 3.76E-03         |
| Orbitals & contribution    | 133 -> 134 84.8% | 132 -> 134 83.4% | 131 -> 134 77.8% | 127 -> 134 64.3% |
| transition dipole moment/D | 1.50             | 2.20             | 0.41             | 0.50             |

Table S21. Overview for **2** in CHCl<sub>3</sub>.

| Excitation Nr.             | 1          |       | 2          |       | 3          |        | 4          |       |
|----------------------------|------------|-------|------------|-------|------------|--------|------------|-------|
| Energy/cm <sup>-1</sup>    | 28295      |       | 28569      |       | 29539      |        | 29748      |       |
| Oszillator strength        | 5.34E-02   |       | 6.50E-02   |       | 2.07E-03   |        | 1.27E-02   |       |
| Orbitals & contribution    | 181 -> 182 | 79.2% | 180 -> 182 | 81.4% | 180 -> 183 | 73.7%  | 181 -> 183 | 77.0% |
| transition dipole moment/D | 180 -> 183 | 9.6%  | 181 -> 183 | 11.7% | 179 -> 183 | 14.4 % | 180 -> 182 | 12.9% |
|                            | 2.00       |       | 2.21       |       | 0.39       |        | 0.97       |       |

Table S22. Overview for **2** in CH<sub>2</sub>Cl<sub>2</sub>.

| Excitation Nr.             | 1          |       | 2          |       | 3          |       | 4          |       |
|----------------------------|------------|-------|------------|-------|------------|-------|------------|-------|
| Energy/cm <sup>-1</sup>    | 28233      |       | 28501      |       | 29478      |       | 29677      |       |
| Oszillator strength        | 5.16E-02   |       | 6.46E-02   |       | 1.66E-03   |       | 1.24E-02   |       |
| Orbitals & contribution    | 181 -> 182 | 78.6% | 180 -> 182 | 80.8% | 180-> 183  | 73.1% | 181 -> 183 | 76.3% |
| transition dipole moment/D | 180 -> 183 | 10.0% | 181 -> 183 | 12.1% | 179 -> 183 | 14.6% | 180 -> 182 | 13.4% |
|                            | 1.97       |       | 2.21       |       | 0.35       |       | 0.96       |       |

Table S23. Overview for **2** in MeCN.

| Excitation Nr.             | 1          |       | 2          |       | 3          |       | 4          |       |
|----------------------------|------------|-------|------------|-------|------------|-------|------------|-------|
| Energy/cm <sup>-1</sup>    | 28178      |       | 28445      |       | 29420      |       | 29615      |       |
| Oszillator strength        | 5.07E-02   |       | 6.53E-02   |       | 1.36E-03   |       | 1.20E-02   |       |
| Orbitals & contribution    | 181 -> 182 | 78.0% | 180 -> 182 | 80.0% | 180 -> 183 | 72.5% | 181 -> 183 | 75.6% |
| transition dipole moment/D | 180 -> 183 | 10.3% | 181 -> 183 | 12.5% | 179 -> 183 | 14.7% | 180 -> 182 | 13.9% |
|                            | 1.95       |       | 2.22       |       | 0.32       |       | 0.95       |       |

Table S24. Overview for **2Au<sub>2</sub>** in CHCl<sub>3</sub>.

| Excitation Nr.             | 1          |       | 2          |       | 3          |       | 4          |       |
|----------------------------|------------|-------|------------|-------|------------|-------|------------|-------|
| Energy/cm <sup>-1</sup>    | 30055      |       | 30482      |       | 30927      |       | 31593      |       |
| Oszillator strength        | 9.18E-02   |       | 1.38E-01   |       | 2.77E-02   |       | 1.17E-02   |       |
| Orbitals & contribution    | 217 -> 218 | 49.9% | 216 -> 218 | 52.4% | 217 -> 219 | 75.0% | 216 -> 219 | 62.3% |
| transition dipole moment/D | 216 -> 218 | 26.7% | 217 -> 218 | 30.0% | 216 -> 218 | 10.0% | 215 -> 219 | 7.6%  |
|                            | 2.55       |       | 3.11       |       | 1.39       |       | 0.90       |       |

Table S25. Overview for **2Au<sub>2</sub>** in CH<sub>2</sub>Cl<sub>2</sub>.

| Excitation Nr.             | 1          |       | 2          |       | 3          |       | 4          |       |
|----------------------------|------------|-------|------------|-------|------------|-------|------------|-------|
| Energy/cm <sup>-1</sup>    | 29881      |       | 30225      |       | 30852      |       | 31306      |       |
| Oszillator strength        | 8.76E-02   |       | 1.35E-01   |       | 1.96E-02   |       | 9.10E-03   |       |
| Orbitals & contribution    | 216 -> 218 | 70.4% | 217 -> 218 | 70.2% | 217 -> 219 | 74.6% | 216 -> 219 | 72.9% |
| transition dipole moment/D | 217 -> 219 | 16.5% | 216 -> 219 | 17.1% | 216 -> 218 | 16.4% | 217 -> 218 | 16.3% |
|                            | 2.49       |       | 3.09       |       | 1.17       |       | 0.80       |       |

Table S26. Overview for **2Au<sub>2</sub>** in MeCN.

| Excitation Nr.             | 1                                    | 2                                    | 3                                   | 4                                   |
|----------------------------|--------------------------------------|--------------------------------------|-------------------------------------|-------------------------------------|
| Energy/cm <sup>-1</sup>    | 29664                                | 29981                                | 30632                               | 31125                               |
| Oszillator strength        | 8.09E-02                             | 1.31E-01                             | 1.77E-02                            | 8.22E-03                            |
| Orbitals & contribution    | 216 -> 218 75.1%<br>217 -> 219 14.1% | 217 -> 218 71.9%<br>216 -> 219 12.1% | 217 -> 219 76.9%<br>217 -> 218 9.1% | 216 -> 219 81.7%<br>217 -> 218 9.8% |
| transition dipole moment/D | 2.41                                 | 3.06                                 | 1.12                                | 0.77                                |

Table S27. Overview for **2Au<sub>2</sub>Zn** in CHCl<sub>3</sub>.

| Excitation Nr.             | 1                | 2                | 3                | 4                                   |
|----------------------------|------------------|------------------|------------------|-------------------------------------|
| Energy/cm <sup>-1</sup>    | 25940            | 26734            | 27878            | 28285                               |
| Oszillator strength        | 1.34E-01         | 1.45E-02         | 7.45E-03         | 5.56E-03                            |
| Orbitals & contribution    | 249 -> 250 95.2% | 248 -> 250 95.4% | 249 -> 251 92.3% | 247 -> 250 85.4%<br>245 -> 250 4.8% |
| transition dipole moment/D | 3.31             | 1.07             | 0.76             | 0.64                                |

Table S28. Overview for **2Au<sub>2</sub>Zn** in CH<sub>2</sub>Cl<sub>2</sub>.

| Excitation Nr.             | 1                | 2                | 3                | 4                                   |
|----------------------------|------------------|------------------|------------------|-------------------------------------|
| Energy/cm <sup>-1</sup>    | 26174            | 27000            | 28289            | 28843                               |
| Oszillator strength        | 1.47E-01         | 1.10E-02         | 6.52E-03         | 5.97E-03                            |
| Orbitals & contribution    | 249 -> 250 95.8% | 248 -> 250 95.6% | 249 -> 251 93.0% | 247 -> 250 79.7%<br>245 -> 250 6.3% |
| transition dipole moment/D | 3.45             | 0.93             | 0.70             | 0.66                                |

Table S29. Overview for **2Au<sub>2</sub>Zn** in MeCN.

| Excitation Nr.             | 1                | 2                | 3                | 4                |
|----------------------------|------------------|------------------|------------------|------------------|
| Energy/cm <sup>-1</sup>    | 26463            | 27344            | 28739            | 29435            |
| Oszillator strength        | 1.60E-01         | 9.35E-03         | 6.50E-03         | 1.18E-02         |
| Orbitals & contribution    | 249 -> 250 96.1% | 248 -> 250 95.8% | 249 -> 251 93.0% | 248 -> 251 93.0% |
| transition dipole moment/D | 3.58             | 0.85             | 0.70             | 0.93             |

Table S30. Overview for **2Zn** in CHCl<sub>3</sub>.

| Excitation Nr.             | 1                | 2                | 3                                   | 4                                   |
|----------------------------|------------------|------------------|-------------------------------------|-------------------------------------|
| Energy/cm <sup>-1</sup>    | 21735            | 23506            | 23990                               | 25332                               |
| Oszillator strength        | 1.71E-03         | 5.28E-04         | 2.13E-03                            | 1.18E-01                            |
| Orbitals & contribution    | 213 -> 214 98.9% | 213 -> 215 91.0% | 212 -> 214 87.8%<br>213 -> 215 8.3% | 211 -> 214 89.0%<br>212 -> 215 3.8% |
| transition dipole moment/D | 0.41             | 0.21             | 0.43                                | 3.14                                |

Table S31. Overview for **2Zn** in CH<sub>2</sub>Cl<sub>2</sub>.

| Excitation Nr.             | 1                | 2                                    | 3                                    | 4                |
|----------------------------|------------------|--------------------------------------|--------------------------------------|------------------|
| Energy/cm <sup>-1</sup>    | 22428            | 24305                                | 24692                                | 25675            |
| Oszillator strength        | 2.15E-03         | 3.54E-04                             | 3.71E-03                             | 1.33E-01         |
| Orbitals & contribution    | 213 -> 214 98.9% | 213 -> 215 84.5%<br>212 -> 214 14.5% | 212 -> 214 80.7%<br>213 -> 215 14.7% | 211 -> 214 92.4% |
| transition dipole moment/D | 0.45             | 0.17                                 | 0.56                                 | 3.31             |

Table S32. Overview for **2Zn** in MeCN.

| Excitation Nr.             | 1                | 2                                    | 3                                    | 4                |
|----------------------------|------------------|--------------------------------------|--------------------------------------|------------------|
| Energy/cm <sup>-1</sup>    | 23121            | 25082                                | 25380                                | 26019            |
| Oszillator strength        | 2.76E-03         | 5.39E-04                             | 7.55E-03                             | 1.42E-01         |
| Orbitals & contribution    | 213 -> 214 98.8% | 213 -> 215 65.1%<br>212 -> 214 32.9% | 212 -> 214 60.0%<br>213 -> 215 33.6% | 211 -> 214 91.2% |
| transition dipole moment/D | 0.50             | 0.21                                 | 0.79                                 | 3.41             |

### Orbitals

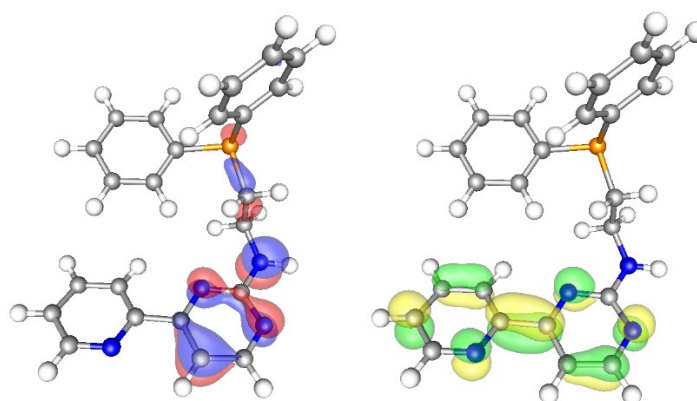

Fig. S10: Orbitals of the transition for **1**, left: HOMO (101); right: LUMO (102).

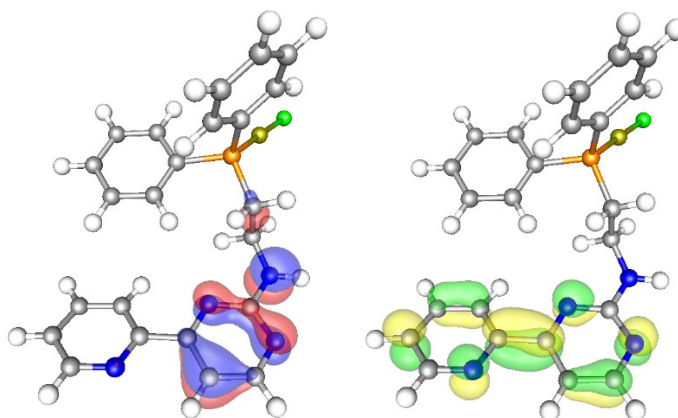

Fig. S11: Orbitals of the transition for **1Au**, left: HOMO (119); right: LUMO (120).

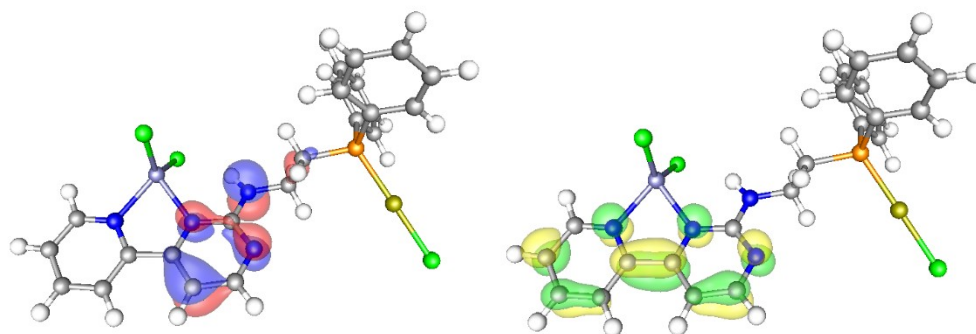

Fig. S12: Orbitals of the transition for **1AuZn**, left: HOMO (151); right: LUMO (152).

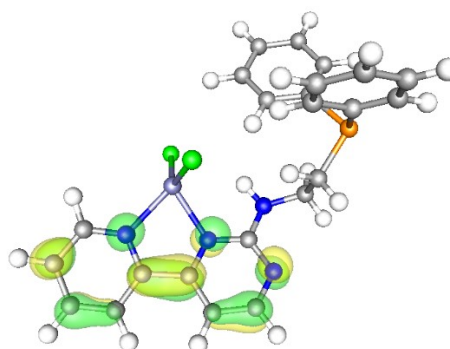

Fig. S13: Orbitals of the transition for **1Zn**, left: HOMO-1 (132); right: LUMO (134).

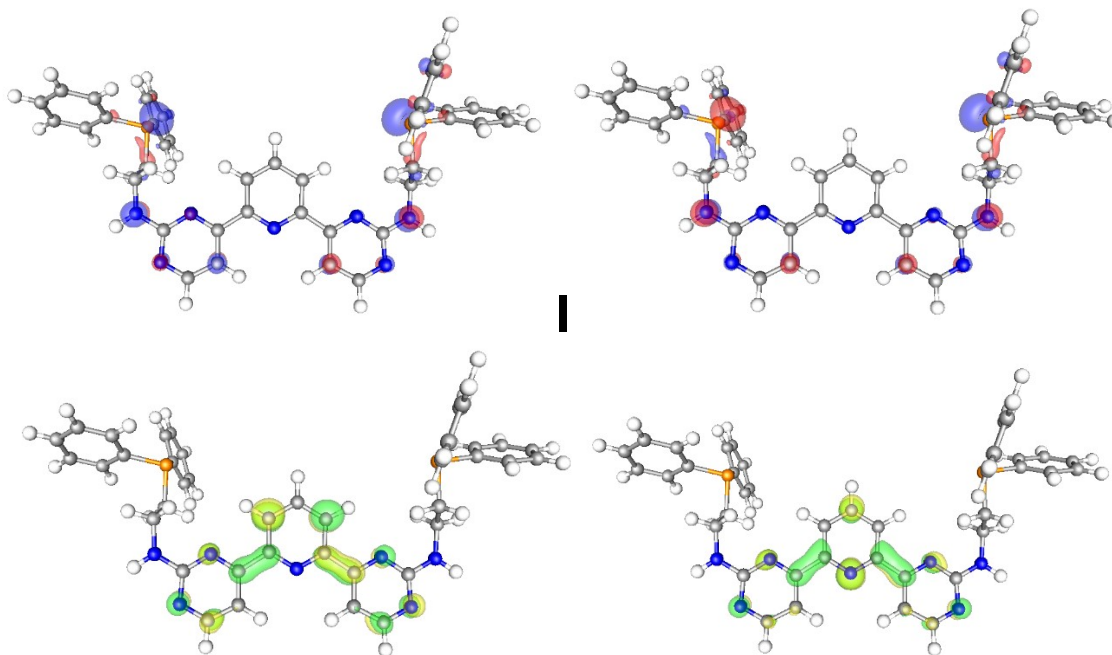

Fig. S14: Orbitals of the transition for **2**, top left: HOMO-1 (180); top right: HOMO (181); bottom left: LUMO (182); bottom right: LUMO+1 (183).

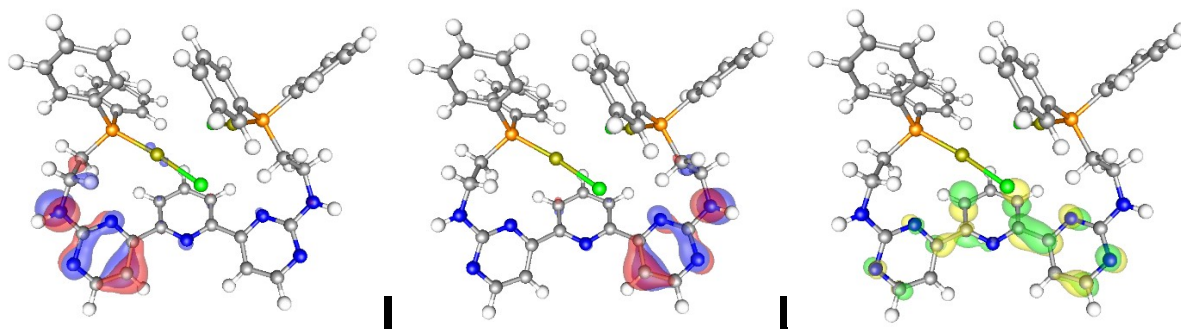

Fig. S15: Orbitals of the transition for **2Au<sub>2</sub>**, left: HOMO-1 (216); middle: HOMO (217); right: LUMO (218).

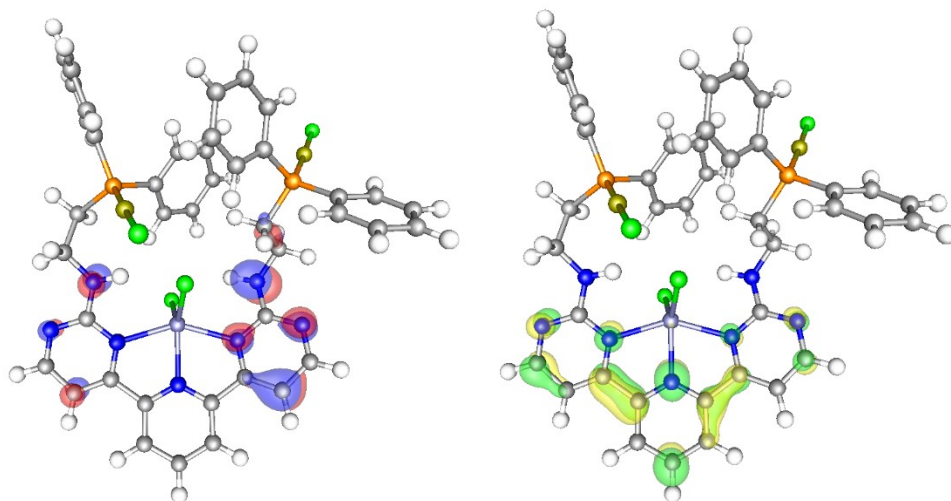

Fig. S16: Orbitals of the transition for **2Au<sub>2</sub>Zn**, left: HOMO (249); right: LUMO (250).

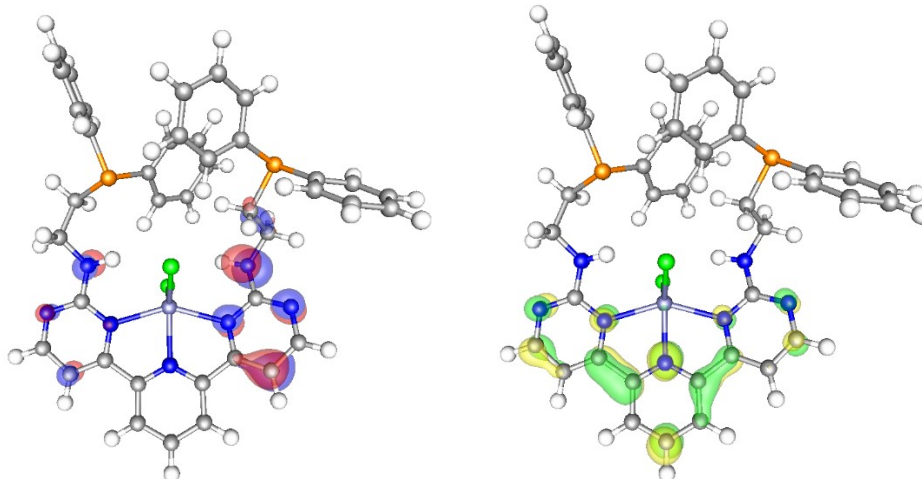

Fig. S17: Orbitals of the transition for **2Zn**, left: HOMO-2 (211); right: LUMO (214).

From Tab. S14-37 it can be seen that for most species the pre-band results from one excitation, characterized as  $\pi$ - $\pi^*$  transition. For **2** and **2Au**, two transitions nearly equally contribute to the pre-band. The reasons for that can be found in the higher symmetry of **2** ( $C_2$ ) and separation of the  $\pi$ -systems due to the non-planarity of **2Au**, respectively. The intense excitation representing the pre-band for **1Zn** is  $S_0 \rightarrow S_2$ . However, the character of the excitation represented by the involved orbitals is analog to **1**, **1Au** and **1AuZn**. The pre-band

of **2Zn** is also not the HOMO – LUMO transition but HOMO-2 – LUMO, representing the excitation from  $S_0$  to  $S_4$  with analog characteristic orbitals like for the other species.

#### Cooperativity:

The analysis of the cooperativity as shown in Tab. 3 uses the maxima of the Gaussian fits. For a more detailed understanding of the origin, the theoretical values are analyzed with respect to the involved states. For this purpose, the equations (3) and (4) with the energy of the  $S_0$  and  $S_1$  states instead of the absorption maximum are used. As mentioned before, the relevant transitions for **1Zn** and **2Zn** are  $S_0 \rightarrow S_2$  and  $S_0 \rightarrow S_4$ , respectively. Thus, these electronic states are chosen for the calculation of  $\tilde{\nu}_{ce}$  in the electronically excited state. The results are summarized in Tab. S32.

Tab. S33: Calculated values of  $\tilde{\nu}_{ce}$  in dependence on the electronic state as obtained from (TD)-B3LYP-D3/def2-TZVP calculations. The excitation represents the difference between ground and excited state ( $S_1 - S_0$ ).

| <b>Compound/state</b>       | $\tilde{\nu}_{ce}/\text{cm}^{-1}$ ( $\text{CHCl}_3$ ) | $\tilde{\nu}_{ce}/\text{cm}^{-1}$ ( $\text{CH}_2\text{Cl}_2$ ) | $\tilde{\nu}_{ce}/\text{cm}^{-1}$ (MeCN) |
|-----------------------------|-------------------------------------------------------|----------------------------------------------------------------|------------------------------------------|
| <b>1 / <math>S_0</math></b> | 130.1                                                 | 36.1                                                           | -42.2                                    |
| <b>1 / <math>S_1</math></b> | -235.4                                                | -605.3                                                         | -1045.8                                  |
| <b>1 / excitation</b>       | -365.6                                                | -641.4                                                         | -1003.6                                  |
|                             |                                                       |                                                                |                                          |
| <b>2 / <math>S_0</math></b> | -1038.8                                               | -996.3                                                         | -932.5                                   |
| <b>2 / <math>S_1</math></b> | -2190.4                                               | -2145.1                                                        | -1974.3                                  |
| <b>2 / excitation</b>       | -1151.6                                               | -1148.8                                                        | -1041.7                                  |

For compound **1**, it can be observed that  $\tilde{\nu}_{ce}$  decreases with the polarity of the solvent, both for the ground state and the excited state. Since the increase of the dipole moments and transition energies also correlate with polarity of the solvent, it can be reasoned that the calculations of these values are consistent. Hence, the values of  $\tilde{\nu}_{ce}$  are reliable. In contrast, it can be seen for compound **2** that  $\tilde{\nu}_{ce}$  increases with polarity of the solvents. This contrast can be explained by varying behavior of the individual species. The excitation energy of **2** and **2Au<sub>2</sub>** decreases with the increasing polarity, while it increases for **2Au<sub>2</sub>Zn** and **2Zn**. This might be a result of the rearrangement due to the coordination of the zinc.



Tab. S34: Calculated values of  $k_{ce}$  using formula (2) to calculate  $k$  and formula (4) and (5) for the cooperative effect.

| <b>Compound/state</b> | $k_{ce}/\text{ns}^{-1}$ ( $\text{CHCl}_3$ ) | $k_{ce}/\text{ns}^{-1}$ ( $\text{CH}_2\text{Cl}_2$ ) | $k_{ce}/\text{ns}^{-1}$ (MeCN) |
|-----------------------|---------------------------------------------|------------------------------------------------------|--------------------------------|
| <b>1</b>              | 0.0376                                      | 0.0403                                               | 0.0476                         |
| <b>2</b>              | -0.150                                      | -0.130                                               | -0.0935                        |

## References

- [1] Spasyuk, D.; Gusev, D. G. *Organometallics*. **2012**, *31* (15), 5239–5242.
- [2] Bejan, E.; Haddou, H. A.; Daran, J. C.; Balavoine, G. G. A. *Synthesis*. **1996**, *1996* (08), 1012–1018.
- [3] Wang, M.-Z.; Wong, M.-K.; Che, C.-M. *Chem. Eur. J.* **2008**, *14* (27), 8353–8364.
- [4] G. M. Sheldrick, *Acta Cryst. A* **2008**, *64*, 112–122; G. M. Sheldrick, *Acta Cryst. C* **2015**, *71*, 3–8.
